# Supplementary material for: DNA methylation patterns in peripheral blood mononuclear cells from Holstein cattle with variable milk yield
Source: BMC Genomics. 2018 Oct 11;19:744. doi: 10.1186/s12864-018-5124-9 (PMC6182825; doi:10.1186/s12864-018-5124-9)
Supplement: Supplementary file 2 — Table S2. Chromosome, start nucleotide, end nucleotide, length, summit, tags, Log P, and fold enrichment of significant peaks for Farm 1, control. DNA methylation peak information for Farm 1, control. (XLSX 13541 kb) [file 12864_2018_5124_MOESM2_ESM.xlsx]

## Sheet: S2
Table S2. Chromosome, start nucleotide, end nucleotide, length, summit, tags, Log_P, and fold enrichment of significant peaks for Farm 1 Control.
Genomic coordinates correspond to: UMD_3.1 (http://www.ncbi.nlm.nih.gov/assembly/GCA_000003055.4)
Chromosome	start	end	length	summit	tags	Log_P	fold_enrichment
chr1	51082	52408	1327	742	56	67.78	5
chr1	48341	49209	884	265	81	121.18	6.75
chr1	42294	43228	935	572	56	84.01	7.7
chr1	65962	67427	1466	625	202	262.51	7.18
chr1	34530	36335	1806	1220	123	144.75	5.78
chr1	81273	83276	2004	1540	109	69.23	5.55
chr1	88722	90658	1937	535	109	73.66	6.18
chr1	94379	94783	405	203	41	243.71	9.07
chr1	102704	103347	644	334	28	54.35	5.75
chr1	111658	112316	659	309	37	96.62	7.08
chr1	123443	124305	863	249	34	54.13	5.31
chr1	126523	127415	893	261	44	94.5	6.64
chr1	138123	138971	849	522	71	148.65	8
chr1	139958	140575	618	251	48	87.05	5.61
chr1	147874	149020	1147	435	53	77.62	6.41
chr1	153515	154712	1198	284	75	160.1	8.15
chr1	155951	157063	1113	439	61	80.36	8.08
chr1	163927	164948	1022	582	64	84.03	6.95
chr1	172891	173813	923	577	67	124.87	7.63
chr1	181735	183154	1420	655	112	162.07	8.18
chr1	186101	186757	657	371	46	59.87	4.95
chr1	187512	188559	1048	482	88	114.26	8.1
chr1	192051	193092	1042	298	84	66.29	5.71
chr1	196329	197225	897	657	40	65.57	4.06
chr1	210573	212000	1428	1164	85	81.79	6.14
	207524	208740	1217	628	68	83.28	7.38
chr1	204104	205443	1340	585	84	85.15	6.46
chr1	220370	221290	921	632	60	109.4	6.01
chr1	248200	249165	966	322	81	236.69	10.29
chr1	251935	252567	633	367	46	119.58	6.1
chr1	258952	260116	1165	322	160	180.22	5.13
chr1	264217	265260	1043	326	100	193.52	8.88
chr1	267834	269596	1763	345	215	197.59	6.53
chr1	278346	279328	983	259	63	60.07	5.48
chr1	284054	286177	2124	393	145	101.07	8.05
chr1	293723	295482	1760	388	198	271.21	5.04
chr1	301438	302702	1265	523	91	162.27	7.07
chr1	304720	306045	1326	698	185	278.43	8.75
chr1	317586	318863	1278	758	108	96.32	6.9
chr1	321140	323215	2076	1371	213	222.56	7.25
chr1	340718	341775	1058	699	71	50.34	5.07
chr1	342233	343156	924	265	93	70.05	5.66
chr1	348477	349779	1303	643	58	65.05	7.04
chr1	352651	353728	1078	545	77	133.06	7.32
chr1	355322	356200	879	613	61	76.14	3.85
chr1	360612	363392	2781	1360	304	110.47	4.88
chr1	367326	368533	1208	621	63	98.73	8.62
chr1	377605	380576	2972	1758	431	212.21	4.83
chr1	382490	383492	1003	311	49	69.86	6.1
chr1	385433	386992	1560	1188	172	240.22	10.12
chr1	390150	391062	913	309	69	117.44	4.99
chr1	400247	400953	707	453	45	84.63	6.74
chr1	401388	402147	760	268	54	64.02	5.79
chr1	406753	407680	928	238	54	80.77	6.37
chr1	414650	415234	585	236	46	167.44	9.66
chr1	417406	418363	958	257	49	79.54	7.36
chr1	421358	422272	915	268	61	104.2	4.92
chr1	437582	438748	1171	544	132	247.08	10.04
chr1	442620	443889	1271	660	118	240.46	9.81
chr1	445867	446833	967	597	43	55.55	5.38
chr1	448652	449197	546	292	27	56.1	5.27
chr1	452174	453711	1538	795	90	108.03	5.99
chr1	459906	460807	902	606	55	99.19	7.79
chr1	464821	465967	1147	671	74	53.18	5.92
chr1	466078	466620	543	253	84	250.82	8.19
chr1	474555	476514	1960	413	169	122.03	6.22
chr1	480565	481645	1081	375	115	296.95	11.22
chr1	483128	483857	730	481	46	73.61	5.74
chr1	485522	486804	1283	540	80	53.04	5.68
chr1	493381	495321	1941	1359	107	102.37	6.67
chr1	500688	501274	587	266	72	222.66	8.95
chr1	507004	508423	1420	698	91	88.03	5.99
chr1	516321	517796	1476	1138	133	205.56	5.69
chr1	572112	573120	1009	662	43	64.38	6.08
chr1	565779	566601	823	514	45	97.14	5.22
chr1	558583	559587	1005	563	90	93.61	6.91
chr1	532566	535057	2492	1846	112	86.73	6.22
chr1	775307	775868	562	263	36	109.97	7.75
chr1	790033	791116	1084	520	120	272.11	9.88
chr1	796275	797254	980	315	60	115.33	8.31
chr1	812165	813869	1705	1208	89	77.49	5.76
chr1	817507	818114	608	331	93	81.34	4.09
chr1	818695	820973	2278	783	248	102.43	7.74
chr1	828403	829164	762	433	42	77.58	6.57
chr1	830958	831404	447	224	28	63.02	4.43
chr1	847401	848687	1287	658	95	51.62	6.66
chr1	857792	859427	1636	402	235	255.27	6.13
chr1	866227	866716	490	246	30	68.68	5.28
chr1	874001	874826	826	582	43	95.7	6.86
chr1	886197	886974	778	347	39	53.15	5.04
chr1	894520	895564	1045	665	209	540.87	8.78
chr1	899673	900304	632	257	49	116.2	6.88
chr1	909352	910835	1484	739	118	115.88	8.62
chr1	913880	915177	1298	835	158	247.01	6.4
chr1	917164	917826	663	397	73	126.54	5.85
chr1	918963	921017	2055	1313	199	226.55	11.62
chr1	931122	932241	1120	476	74	65.23	2.97
chr1	934218	935271	1054	561	84	168.46	6.58
chr1	940897	943692	2796	701	292	123.86	5.3
chr1	950097	952338	2242	1918	269	126.78	4.79
chr1	956194	957424	1230	945	76	117.37	5.82
chr1	968322	969108	787	265	43	75.77	7.15
chr1	990375	992166	1792	753	148	133.56	6.75
chr1	994337	995259	923	232	48	76.62	6.97
chr1	1007347	1008404	1058	613	75	100.77	8.18
chr1	1010511	1011567	1057	407	67	126.99	9.98
chr1	1016273	1017074	802	312	63	75.81	5.48
chr1	1026250	1027792	1543	892	308	564.91	6.54
chr1	1029623	1030576	955	600	80	214.88	10.71
chr1	1032879	1035748	2870	2171	200	92.54	4.24
chr1	1038583	1039421	839	483	44	102.86	6.86
chr1	1042250	1043007	758	419	43	91.4	6.85
chr1	1048994	1050044	1051	635	42	65.73	7.97
chr1	1053433	1054481	1049	642	61	142.21	9.02
chr1	1057141	1058366	1226	641	98	247.72	9.66
chr1	1061728	1062507	780	471	68	193.83	10.06
chr1	1064997	1065828	834	484	53	124.29	8.85
chr1	1067967	1069027	1061	753	115	282.28	11.53
chr1	1070969	1072355	1387	941	216	349.45	9.36
chr1	1079912	1080549	638	314	42	76.07	5.14
chr1	1087333	1088250	919	603	138	417.52	11.44
chr1	1090497	1092894	2398	1121	250	161.73	7.34
chr1	1100175	1102165	1991	611	144	134.06	9.95
chr1	1106210	1107310	1101	378	91	185.19	6.71
chr1	1112396	1113523	1131	789	118	337.64	11.08
chr1	1124913	1126851	1939	435	121	125.03	4.32
chr1	1137279	1138041	763	512	38	52.45	5.89
chr1	1139080	1140221	1142	496	54	64.02	5.12
chr1	1143386	1144738	1353	597	106	97.57	7.35
chr1	1148804	1150083	1280	682	74	67.32	7.12
chr1	1153313	1154899	1587	771	112	146.48	8.17
chr1	1158400	1160052	1653	1376	103	138.07	7.63
chr1	1162297	1163714	1418	775	135	216.36	10.3
chr1	1169340	1171967	2628	1949	187	91.7	7.72
chr1	1176089	1177116	1028	611	90	67.7	4.8
chr1	1178051	1179554	1504	1180	132	99.02	4.03
chr1	1192761	1194723	1963	595	104	75.64	6.98
chr1	1200993	1201683	691	433	71	261.14	11.09
chr1	1212601	1213232	632	305	131	591.88	14.22
chr1	1216300	1217139	840	226	37	69.33	7.08
chr1	1233131	1233772	642	385	35	88.85	7.3
chr1	1239837	1241481	1645	895	177	271.73	8.71
chr1	1251288	1252470	1183	748	277	314.61	6.25
chr1	1256115	1257151	1037	614	187	246.16	6.35
chr1	1269604	1270165	562	264	33	64.19	5.63
chr1	1272544	1273729	1186	718	92	194.4	10.28
chr1	1283338	1285141	1804	393	226	334.93	10.69
chr1	1290825	1291463	639	334	50	181.19	10.18
chr1	1308277	1309707	1432	672	85	113.82	8.39
chr1	1316847	1318107	1261	727	76	79.31	7.26
chr1	1321616	1322828	1213	706	65	78.49	4.78
chr1	1329460	1331110	1651	725	126	115.66	6.83
chr1	1334427	1335840	1414	694	137	161.98	6.13
chr1	1344532	1345803	1272	567	102	72.91	7.4
chr1	1357190	1358051	862	266	41	84.64	7.08
chr1	1376655	1378050	1396	714	98	71.2	6.69
chr1	1381123	1383138	2016	826	249	125.45	4.29
chr1	1388236	1390017	1782	1387	95	58.67	5.55
chr1	1401584	1403406	1823	279	84	75.29	4.78
chr1	1405130	1406159	1030	449	38	52.62	5.09
chr1	1409801	1410663	863	256	41	59.4	6.75
chr1	1411884	1413442	1559	1250	126	94.59	6.53
chr1	1425911	1426821	911	258	53	56.07	4.44
chr1	1429988	1431324	1337	633	98	78.08	6.16
chr1	1436095	1437083	989	322	62	71.22	4.82
chr1	1441404	1442643	1240	996	72	68.97	5.05
chr1	1444707	1445681	975	455	41	52.81	6.41
chr1	1447250	1448238	989	723	55	109.94	7.23
chr1	1452869	1453997	1129	763	90	174.77	5.08
chr1	1456857	1457787	932	397	39	66.79	6.42
chr1	1461122	1462551	1430	687	132	264.91	10.42
chr1	1467308	1469986	2679	2333	323	136.28	4.89
chr1	1473297	1473905	609	266	28	56.33	5.58
chr1	1475903	1478177	2276	1435	297	262.96	8.07
chr1	1479833	1482186	2354	2088	240	215.09	7.6
chr1	1484888	1486852	1965	712	146	155.97	5.79
chr1	1503218	1504152	935	268	48	99.98	9.01
chr1	1528734	1530107	1375	721	99	133.94	9.57
chr1	1534481	1536726	2246	730	133	84.05	5.56
chr1	1539327	1540445	1119	601	48	82.66	7.52
chr1	1551516	1552546	1032	537	57	138.26	10.4
chr1	1555676	1556651	977	620	48	92.23	7.26
chr1	1558175	1560152	1978	922	171	173.52	7.71
chr1	1564093	1565338	1246	685	137	191.7	7.28
chr1	1568225	1568754	530	266	51	210.26	10.69
chr1	1570674	1571391	718	458	89	340.32	12.49
chr1	1575957	1577166	1209	563	111	98.59	4.39
chr1	1580397	1581382	986	260	68	100.67	8.42
chr1	1582960	1584214	1255	751	139	190.66	10.05
chr1	1589259	1589786	528	265	36	115.74	7.97
chr1	1592434	1593075	642	318	54	157.03	7.9
chr1	1607464	1608674	1211	679	182	311.13	9.36
chr1	1611055	1612830	1776	1200	131	122.08	6.92
chr1	1615765	1617479	1715	267	120	56.76	5.55
chr1	1618112	1619408	1297	452	188	183.01	6.85
chr1	1624067	1624924	858	375	66	229.98	11.73
chr1	1628403	1629772	1370	662	103	228.94	9.8
chr1	1639771	1642371	2601	1175	221	77.6	7.09
chr1	1644032	1646017	1986	670	130	64.64	5.25
chr1	1656553	1657668	1116	874	73	51	3.04
chr1	1659461	1661259	1799	1209	133	107.92	4.74
chr1	1670303	1672637	2335	710	160	50.11	4.68
chr1	1674982	1675738	761	504	89	367.04	14.57
chr1	1679297	1680250	954	405	50	91.14	6.97
chr1	1682197	1683311	1115	836	71	73.23	4.22
chr1	1687181	1688249	1069	752	130	246.95	7.53
chr1	1690070	1691908	1839	732	165	200.41	7.67
chr1	1697406	1697953	548	256	44	158.5	9.52
chr1	1700112	1702118	2011	320	134	108.29	7.63
chr1	1705627	1706727	1101	668	105	214.07	7.86
chr1	1708607	1709512	906	641	96	171	8.08
chr1	1710971	1713706	2736	1763	303	127.47	5.44
chr1	1716295	1718439	2145	1582	151	110.93	7.19
chr1	1723720	1724868	1149	431	86	147.78	7.94
chr1	1728350	1730425	2076	698	88	68.18	7.4
chr1	1731528	1732926	1399	799	145	227.8	11.14
chr1	1744534	1746328	1795	578	126	190.36	6.13
chr1	1748843	1750523	1681	713	92	62.17	5.05
chr1	1754938	1755922	987	372	71	58.11	5.47
chr1	1761137	1761929	793	384	72	190.61	9.4
chr1	1767478	1768715	1238	480	61	85.36	6.28
chr1	1773949	1774734	786	254	35	52.76	5.9
chr1	1788811	1789627	817	534	77	109.2	6.66
chr1	1796390	1797645	1256	714	86	151.52	10.14
chr1	1807014	1808278	1265	1020	94	80.95	5.29
chr1	1809001	1809899	899	396	84	90.67	5.86
chr1	1830843	1831557	715	265	51	161.73	10.4
chr1	1834009	1835222	1214	694	52	63.76	7.57
chr1	1846526	1847783	1258	503	66	50.58	5.11
chr1	1849983	1851793	1811	683	109	82.83	7.64
chr1	1873191	1874148	958	426	62	163.97	10.27
chr1	1887559	1888098	540	267	49	184.69	9.53
chr1	1894836	1896195	1360	1079	162	107.35	5.34
chr1	1897422	1898567	1147	500	167	188.48	8.21
chr1	1901021	1901548	528	265	34	78.44	5.98
chr1	1909268	1909961	694	262	37	90.55	7.08
chr1	1915998	1917146	1149	666	63	99.4	8.74
chr1	1924248	1925276	1029	740	45	80.72	5.31
chr1	1929284	1930333	1050	355	60	79.41	4.37
chr1	1931117	1932212	1096	708	61	68.66	4.56
chr1	1939785	1941133	1349	647	92	74.13	3.98
chr1	1949590	1950677	1088	356	115	131.1	6.85
chr1	1967664	1969243	1580	1004	149	101.91	5.16
chr1	1976067	1976896	830	281	59	191.29	9.96
chr1	1979914	1981834	1921	725	130	177.16	6.09
chr1	1983758	1984896	1139	631	84	202.73	11.7
chr1	1987071	1989369	2299	1546	176	139.59	6.65
chr1	1993098	1994326	1231	481	88	136.45	8.74
chr1	1996615	1999525	2911	481	213	111.17	6.87
chr1	2008081	2009313	1233	735	141	285.81	12.64
chr1	2019316	2020455	1140	849	146	150.25	5.94
chr1	2021720	2022721	1002	320	124	70.34	3.28
chr1	2027044	2027815	772	508	48	55.24	4.29
chr1	2028151	2029012	862	349	55	62.05	6.14
chr1	2032197	2033561	1371	978	83	103.02	5.17
chr1	2036676	2038518	1847	580	219	266.8	10.62
chr1	2046257	2047736	1481	812	108	108.97	7.06
chr1	2050806	2052234	1429	703	82	52.59	4.36
chr1	2053436	2054078	643	292	49	66.81	4.91
chr1	2057802	2058657	857	617	46	89.37	6.09
chr1	2063719	2064751	1040	434	65	136.6	9.24
chr1	2074961	2075964	1004	291	111	191.51	9.28
chr1	2077411	2078038	628	314	76	168	6.64
chr1	2083403	2084616	1214	339	122	123.85	6.7
chr1	2088047	2089313	1267	595	100	163.47	11.29
chr1	2092158	2093221	1064	697	66	119.57	7.62
chr1	2100046	2100607	562	271	25	51.46	4.87
chr1	2127229	2128218	990	696	133	316.71	10.55
chr1	2131648	2133924	2278	1725	153	81.34	7.5
chr1	2135586	2136827	1242	483	175	375.48	9.41
chr1	2138760	2139797	1038	713	119	330.22	7.46
chr1	2148684	2149653	970	545	40	66.58	5.98
chr1	2159425	2160089	665	422	37	55.49	4.74
chr1	2160792	2161807	1016	732	60	90.71	6.83
chr1	2164158	2164593	436	219	31	128.39	6.86
chr1	2166369	2168658	2290	552	212	213.45	5.8
chr1	2170553	2173262	2710	1931	232	124.52	7.26
chr1	2175749	2176423	675	363	67	192.79	9.18
chr1	2178278	2179228	951	567	132	336.45	11.25
chr1	2184387	2185248	862	257	33	50.34	4.87
chr1	2188354	2189296	943	265	68	128.18	8.81
chr1	2195798	2197056	1259	507	108	152.31	8.34
chr1	2202067	2204049	1983	1672	191	238.15	9.06
chr1	2209319	2210960	1642	669	188	138.76	4.19
chr1	2211735	2213244	1510	1097	197	104.08	4.21
chr1	2217419	2218378	960	312	134	146.75	7.03
chr1	2246164	2247081	918	252	105	237.61	10.75
chr1	2256936	2257683	748	483	45	110.35	8.02
chr1	2260781	2261874	1094	427	118	218.02	10.45
chr1	2262831	2264290	1460	883	117	74.04	4.29
chr1	2275727	2277382	1656	311	105	137.27	5.49
chr1	2278556	2280886	2331	655	190	91.77	5.38
chr1	2282096	2285258	3163	1362	281	56.86	3.85
chr1	2298612	2301977	3366	2694	443	142.36	6.4
chr1	2304252	2305883	1632	1002	188	235.94	8.36
chr1	2327425	2329449	2025	1487	118	75.92	4.22
chr1	2335517	2337083	1567	760	128	171.17	8.9
chr1	2344922	2346251	1331	881	144	239.33	9.28
chr1	2353033	2353585	553	244	29	60.75	5.25
chr1	2356216	2357598	1383	760	68	54.75	5.15
chr1	2361867	2363057	1191	494	79	118.66	5.35
chr1	2364565	2365167	602	322	67	161.02	6.95
chr1	2373348	2373839	492	247	28	51.94	4.75
chr1	2379909	2380798	890	327	35	55.21	5.98
chr1	2395941	2396776	836	268	102	134.31	7.01
chr1	2408609	2409498	890	343	67	100.72	7.53
chr1	2413033	2414122	1090	616	124	200.96	6.93
chr1	2418851	2419373	523	262	45	68.97	4.72
chr1	2426139	2427473	1335	709	87	117.18	7.41
chr1	2432580	2433587	1008	659	59	61.99	5.2
chr1	2439190	2441095	1906	656	105	120.22	6.56
chr1	2445883	2446661	779	337	66	116.14	6.53
chr1	2459457	2460536	1080	690	117	296.23	11.95
chr1	2465296	2466169	874	267	73	166.81	7.55
chr1	2468328	2469178	851	286	130	410.15	11.19
chr1	2472228	2472723	496	249	38	90.62	5.96
chr1	2479497	2480587	1091	359	70	87.88	4.96
chr1	2482339	2483453	1116	463	91	158.24	8.96
chr1	2485807	2486976	1170	482	63	70.09	7.69
chr1	2488380	2489459	1080	491	59	96.54	5.98
chr1	2503099	2504206	1108	540	97	71.3	3.72
chr1	2504368	2505459	1092	368	128	141.82	7.99
chr1	2513527	2515038	1512	719	188	228.58	8.92
chr1	2515783	2518247	2465	1261	112	63.93	5.25
chr1	2519887	2522020	2134	281	172	132.27	4.9
chr1	2529592	2530235	644	298	35	83.78	6.57
chr1	2534462	2536649	2188	722	134	51.17	7.01
chr1	2536929	2538665	1737	1320	119	67.52	4.48
chr1	2543787	2544468	682	268	30	58.39	5.53
chr1	2548633	2549581	949	557	83	211.65	10.45
chr1	2554353	2555260	908	519	35	53.35	6.86
chr1	2557677	2558740	1064	292	119	261.13	11.45
chr1	2560679	2561449	771	276	71	179.23	7.66
chr1	2584814	2585971	1158	490	47	71.58	6.94
chr1	2592276	2593419	1145	456	52	90.54	6.36
chr1	2595755	2596470	716	296	29	50.04	4.43
chr1	2598396	2598973	578	313	29	68.31	6.2
chr1	2610917	2611718	802	250	46	90.29	6.28
chr1	2618634	2619941	1308	791	96	133.9	8.55
chr1	2622561	2623100	540	245	40	94.81	5.96
chr1	2623499	2623950	452	227	30	82.5	5.49
chr1	2627587	2629329	1743	622	204	235.41	5.3
chr1	2635016	2636028	1013	614	70	117.21	5.01
chr1	2638124	2639227	1104	449	94	164.18	7.2
chr1	2643801	2645532	1732	783	232	313.95	7.99
chr1	2649333	2650193	861	443	36	62.49	5.53
chr1	2653618	2654233	616	343	29	62.67	5.75
chr1	2674871	2676705	1835	1002	164	66.82	5.43
chr1	2682127	2683308	1182	632	76	59.58	6.36
chr1	2688646	2689997	1352	750	81	109.39	9.47
chr1	2712237	2713823	1587	1249	109	154.31	6.09
chr1	2719536	2721515	1980	1359	161	73.27	6.41
chr1	2722009	2722895	888	625	72	56.17	5.19
chr1	2726598	2727518	921	643	93	307.62	14.07
chr1	2729242	2730179	938	621	35	50.36	6.64
chr1	2732346	2733077	732	267	43	53.54	5.2
chr1	2733503	2734718	1216	259	64	77.92	6.06
chr1	2738472	2739092	621	320	34	85	6.73
chr1	2741098	2742520	1423	669	64	68.87	6.39
chr1	2744452	2745750	1300	589	76	112.76	8.48
chr1	2747846	2748735	884	392	185	614.01	13.12
chr1	2753660	2754468	809	559	39	68.04	6.22
chr1	2757336	2758252	917	578	65	133.52	7.25
chr1	2761391	2764248	2859	2247	192	93.33	6.46
chr1	2768426	2771083	2658	1377	221	129.53	6.19
chr1	2778334	2779165	832	386	222	561.72	8.97
chr1	2808418	2809703	1286	492	109	155.94	7.01
chr1	2819087	2820455	1364	488	82	123.12	6.22
chr1	2825927	2826735	809	257	50	99.71	7.29
chr1	2844414	2845747	1334	427	165	196.83	6.81
chr1	2853094	2854450	1358	738	87	124.27	8.62
chr1	2856665	2857940	1276	717	63	58.75	6.89
chr1	2870329	2872657	2329	790	268	166.22	6.6
chr1	2893441	2895825	2385	2037	168	144.14	5.32
chr1	2901764	2905052	3289	713	311	57.88	5.85
chr1	2906538	2908509	1972	490	170	75.4	4.38
chr1	2913573	2914486	914	654	77	129.37	8.29
chr1	2925590	2926846	1257	915	103	57.44	5.24
chr1	2927199	2927816	618	267	50	56.36	4.42
chr1	2929709	2930167	459	230	31	76.82	4.9
chr1	2931942	2932949	1008	595	45	82.29	5.05
chr1	2934746	2936010	1265	398	95	170.34	7.22
chr1	2944674	2946119	1445	768	138	236.87	12.19
chr1	2950853	2951886	1034	628	58	100.52	7.77
chr1	2956370	2957407	1038	651	56	120.81	9.95
chr1	2969501	2970755	1255	597	43	50.23	8.85
chr1	2976111	2977746	1636	946	128	106.01	7.28
chr1	2984216	2985129	914	252	60	54.92	4.91
chr1	2993027	2994679	1653	1279	161	110.12	7.48
chr1	2996224	2997369	1146	594	187	212.18	5.77
chr1	3002102	3003852	1751	530	215	277.26	9.97
chr1	3005623	3006375	753	518	40	96.34	4.87
chr1	3010476	3011647	1172	626	43	57.46	6.86
chr1	3020356	3022529	2174	1576	96	60.96	3.9
chr1	3028379	3029848	1470	805	79	107.79	8.18
chr1	3037151	3037859	709	268	41	109.44	7.52
chr1	3039949	3040954	1006	595	38	54.93	6.42
chr1	3046438	3047960	1523	581	59	82.65	5.75
chr1	3082106	3082961	856	560	33	50.95	5.09
chr1	3088213	3088874	662	259	126	455.06	10.87
chr1	3090241	3091444	1204	918	93	130.32	5.72
chr1	3093218	3093873	656	267	42	55.74	5.04
chr1	3110474	3111559	1086	728	94	209.96	11.52
chr1	3119435	3120357	923	453	76	125.37	6.54
chr1	3137755	3138520	766	446	61	60.29	5.01
chr1	3138777	3140219	1443	542	95	53.93	4.17
chr1	3144329	3145336	1008	741	57	142.47	8.41
chr1	3153098	3154242	1146	566	95	108.34	6.44
chr1	3218568	3219610	1032	463	40	59.91	6.64
chr1	3211105	3212619	1515	671	206	380.86	9.49
chr1	3206148	3208795	2648	1141	178	93.42	5.03
chr1	3200345	3202777	2433	2090	164	113.24	7.72
chr1	3196278	3198103	1826	1107	149	125.92	6.39
chr1	3191268	3192455	1189	471	48	52.91	7.2
chr1	3186441	3187178	738	233	35	73.82	7.3
chr1	3182490	3184835	2346	679	156	120.21	5.87
chr1	3174213	3175773	1561	963	116	100.38	5.83
chr1	3168027	3170092	2066	487	209	253.59	5.57
chr1	3236168	3236945	778	512	42	75.11	6.93
chr1	3246661	3250124	3464	802	257	52.22	4.96
chr1	3258566	3259562	1001	259	106	111.32	6.85
chr1	3260148	3262126	1980	517	176	56.7	7.72
chr1	3263706	3264726	1021	349	75	91.24	4.08
chr1	3266896	3268377	1482	267	77	74.52	5.25
chr1	3271881	3273681	1801	1493	77	92.46	4.42
chr1	3279597	3281689	2093	332	181	201.77	5.53
chr1	3284209	3285106	898	563	52	64.27	6.31
chr1	3288204	3289499	1298	754	128	72.12	4.62
chr1	3294543	3296476	1934	256	150	192.64	7.87
chr1	3299809	3300482	674	305	140	498.28	11.32
chr1	3304770	3306428	1664	1299	184	121.08	5.47
chr1	3314649	3315565	917	654	57	53.93	4.1
chr1	3321984	3323315	1332	695	119	260.07	11.11
chr1	3325161	3327900	2740	1807	241	144.62	5.36
chr1	3330820	3332102	1283	826	106	203.96	6.62
chr1	3335318	3336968	1651	381	75	97.7	4.52
chr1	3340136	3341189	1054	343	87	91.88	6.88
chr1	3350645	3352337	1693	1123	183	95.82	5.97
chr1	3354598	3356086	1489	710	128	93.76	6.88
chr1	3357477	3358272	796	381	79	112.12	5.15
chr1	3362027	3363538	1512	690	164	234.15	9.88
chr1	3367492	3369052	1562	670	92	97.08	4.63
chr1	3374090	3374973	884	405	72	79.42	4.83
chr1	3377053	3379985	2935	1877	171	63.06	6.41
chr1	3386316	3387638	1323	763	91	73.72	3.99
chr1	3395381	3395998	618	262	41	73.65	5.5
chr1	3399978	3402192	2215	1790	95	61.01	6.6
chr1	3404511	3406810	2299	1376	173	102.11	4.96
chr1	3411856	3412715	860	232	34	54.45	4.87
chr1	3414085	3415550	1466	747	91	66.98	6.93
chr1	3417390	3418832	1443	730	93	83.41	4.44
chr1	3424806	3426402	1597	1334	94	142.34	8.61
chr1	3430296	3431571	1279	671	89	170.61	11.93
chr1	3433583	3434110	528	265	40	75.42	5.29
chr1	3434321	3435211	890	268	59	90.1	7.66
chr1	3440098	3442753	2656	744	368	231.94	7.47
chr1	3445761	3447510	1748	266	76	54.24	5.43
chr1	3449591	3450352	762	265	35	59.64	6.35
chr1	3452740	3453555	816	557	55	79.51	6.82
chr1	3453725	3454674	950	265	79	125.37	8.98
chr1	3456424	3457877	1454	1199	170	195	5.61
chr1	3463412	3465188	1787	1077	316	301.12	6.46
chr1	3493260	3494447	1188	676	140	185.95	7.43
chr1	3502262	3503734	1473	795	126	122.78	5.81
chr1	3505599	3507678	2080	1093	119	67.34	5.97
chr1	3513116	3514247	1132	787	70	62.04	4.41
chr1	3516462	3517322	861	573	60	62.86	5.01
chr1	3520373	3523197	2826	1012	243	52.83	4.49
chr1	3526343	3528442	2101	1343	147	133.19	8.59
chr1	3530502	3531441	940	569	52	83	7.59
chr1	3534643	3535719	1077	762	94	83.74	5.73
chr1	3555622	3556754	1133	564	118	194.5	9.71
chr1	3560635	3561678	1045	537	107	144.19	8.38
chr1	3568110	3569740	1629	282	220	266.47	11.53
chr1	3569823	3571616	1794	1241	221	273.88	10.87
chr1	3575940	3577420	1481	767	133	58	5.86
chr1	3578517	3580705	2189	1757	203	155.54	5.44
chr1	3583290	3583897	608	351	43	83.54	5.88
chr1	3587051	3589374	2324	598	272	144.69	7.36
chr1	3591127	3592643	1517	616	170	104.97	6.24
chr1	3608310	3609132	827	458	46	69.14	5.8
chr1	3614577	3616193	1617	664	147	141.38	5.35
chr1	3624380	3626392	2013	1437	185	60.33	7.73
chr1	3626730	3628179	1450	1006	130	55.34	4.79
chr1	3633849	3634777	929	310	38	63	7.97
chr1	3651886	3652604	719	357	106	260.74	8.2
chr1	3666306	3667122	817	550	52	89.75	7.07
chr1	3672311	3674258	1950	725	222	191.25	8.98
chr1	3675925	3677786	1862	238	107	64.41	3.93
chr1	3680273	3681118	846	252	47	117.38	8.19
chr1	3685526	3686406	881	408	58	79.65	4.25
chr1	3687801	3689291	1491	731	131	161.35	9.09
chr1	3694374	3695448	1076	679	69	74.64	3.8
chr1	3697725	3699155	1431	725	115	135.59	8.25
chr1	3705686	3706945	1260	431	51	70.25	4.77
chr1	3715576	3716393	818	309	116	150.79	6.32
chr1	3748281	3749865	1585	887	107	72.79	7.21
chr1	3754296	3755002	707	440	41	97.07	6.02
chr1	3784409	3785629	1221	463	71	62.93	5.42
chr1	3786905	3787948	1044	366	63	66.93	6.22
chr1	3795739	3796230	492	247	27	75.2	5.98
chr1	3798061	3799118	1058	545	88	135.57	5.81
chr1	3805829	3806696	868	540	103	295.22	11.41
chr1	3809909	3811079	1171	667	49	80.77	8.63
chr1	3822612	3823124	513	257	32	97.62	7.08
chr1	3829125	3830433	1309	675	51	50.25	6.95
chr1	3838005	3838812	808	472	47	62.32	5.61
chr1	3843572	3844364	793	335	33	52.92	5.03
chr1	3846517	3847442	926	469	38	50.35	5.83
chr1	3863497	3864466	970	417	50	104.19	7.13
chr1	3870502	3871917	1406	767	111	126.98	8.77
chr1	3880018	3881255	1238	619	59	116.31	9.52
chr1	3884574	3885175	602	255	37	107.52	7.75
chr1	3887154	3888023	870	260	34	53.39	6.42
chr1	3892566	3893891	1330	690	73	85.35	9.55
chr1	3913035	3914244	1210	634	68	60.54	6.84
chr1	3924995	3926338	1343	370	57	86.97	5.64
chr1	3943658	3945290	1633	527	136	208.96	8.08
chr1	3966440	3968659	2220	1751	125	59.92	5.91
chr1	4035709	4036453	745	352	48	142.63	9.96
chr1	4041394	4042400	1007	316	48	63.39	5.65
chr1	4058165	4059115	951	520	36	52.83	5.53
chr1	4069324	4069765	442	222	28	97.62	6.2
chr1	4121775	4122473	698	436	77	256.64	10.6
chr1	4134255	4135319	1065	691	50	95.53	8.89
chr1	4164092	4164820	729	354	45	128.27	9.07
chr1	4114804	4116110	1310	627	72	112.21	7.56
chr1	4187294	4188239	946	268	53	110.83	8.36
chr1	4200745	4202017	1273	828	53	78.79	5.21
chr1	4257375	4257967	593	257	57	206.35	10.36
chr1	4305854	4306948	1095	481	40	53.79	6.2
chr1	4316362	4317437	1076	745	86	247.51	12.14
chr1	4375946	4376515	570	274	52	208.25	10.39
chr1	4389293	4389863	571	266	35	102.16	7.52
chr1	4396108	4396616	514	258	30	86.15	6.64
chr1	4413346	4414030	685	364	62	97.83	5.63
chr1	4415185	4416534	1350	1055	90	157.21	8.12
chr1	4422372	4424559	2188	1448	142	137.3	9.04
chr1	4437075	4438304	1230	602	59	92.45	7.23
chr1	4454382	4455259	878	652	42	72.66	7.86
chr1	4462661	4463651	991	499	62	158.5	10.05
chr1	4468701	4469480	780	275	34	63.69	5.75
chr1	4479166	4479926	761	294	124	347.41	8.25
chr1	4490582	4491127	546	266	30	78.82	6.42
chr1	4500604	4501432	829	484	43	99.37	5.31
chr1	4516587	4517186	600	304	38	113.82	7.75
chr1	4526026	4526992	967	600	48	100.07	8.03
chr1	4529184	4530215	1032	575	72	72.42	3.92
chr1	4531459	4532445	987	700	100	154.08	8.87
chr1	4544098	4544892	795	297	40	84.46	6.15
chr1	4591478	4592333	856	410	41	54.42	6.22
chr1	4593853	4594624	774	310	59	153.04	7.29
chr1	4601743	4602932	1190	686	68	98.17	9.41
chr1	4606533	4607330	798	496	50	143.33	9.96
chr1	4624716	4625252	537	249	25	54.86	5.31
chr1	4641635	4642602	970	686	41	70.74	7.3
chr1	4648444	4650050	1607	400	227	437.47	7.45
chr1	4654431	4655187	757	261	56	188.44	11.41
chr1	4683302	4685475	2174	1490	187	121.76	5.94
chr1	4717733	4719303	1571	243	123	184.53	9.03
chr1	4738746	4739647	902	637	36	57.9	7.08
chr1	4741704	4742424	721	320	107	473.73	16.31
chr1	4747391	4748453	1066	753	99	265.87	12.73
chr1	4753025	4755386	2362	1507	315	281.61	6.67
chr1	4758250	4758781	532	267	33	97.62	7.3
chr1	4760798	4761719	922	639	45	95.06	8.63
chr1	4766707	4767858	1152	411	66	165.36	8.41
chr1	4777015	4777875	861	354	35	58.36	6.2
chr1	4786314	4786805	492	247	60	305.65	11.78
chr1	4789079	4789936	858	426	46	82.66	5.98
chr1	4790755	4791353	599	267	33	55.1	5.19
chr1	4797680	4798316	637	395	27	50.84	5.53
chr1	4806315	4806992	678	229	36	88.01	6.2
chr1	4819155	4820399	1242	510	58	67.41	5.66
chr1	4822615	4823671	1057	414	75	193.72	9.61
chr1	4847979	4848538	560	268	96	339.18	9.69
chr1	4849045	4849655	611	301	68	143.91	6.6
chr1	4867354	4868156	803	517	47	50.14	5.63
chr1	4868975	4869789	815	437	73	162.85	7.96
chr1	4875074	4876357	1284	642	90	124.14	10.28
chr1	4893943	4894509	567	263	29	70.05	6.2
chr1	4911023	4912144	1122	318	108	182.52	7.94
chr1	4917793	4919409	1617	713	126	191.53	7.56
chr1	4938281	4939018	738	265	33	64.6	7.08
chr1	4949117	4950434	1318	400	244	601.01	9.36
chr1	4954986	4956499	1514	1152	131	261.3	9.91
chr1	4972493	4974888	2401	2052	165	130.22	8.51
chr1	4985304	4986216	914	257	37	60.61	6.42
chr1	4991601	4992221	621	295	27	52.82	5.09
chr1	4997411	4998298	888	262	37	63.54	7.08
chr1	5022946	5024233	1290	705	47	60.93	7.97
chr1	5028085	5029453	1369	262	108	141.78	6
chr1	5036028	5036836	809	552	48	129.65	8.85
chr1	5048005	5049416	1412	680	87	184.32	8.5
chr1	5052240	5053408	1169	678	64	136.76	10.87
chr1	5081514	5082490	977	298	77	227.25	11.57
chr1	5087004	5087594	591	313	102	410.79	11.22
chr1	5095625	5096695	1071	508	84	284.59	12.22
chr1	5099673	5100220	548	263	25	53.34	5.31
chr1	5104255	5105254	1000	264	63	176.07	9.88
chr1	5107368	5108294	927	374	58	117.15	8.73
chr1	5123705	5125060	1356	831	167	291.68	9.7
chr1	5129287	5130652	1359	607	71	131.51	8.84
chr1	5140993	5141846	854	319	34	55.09	6.42
chr1	5158481	5159014	534	268	51	162.7	8.2
chr1	5175735	5176604	870	360	44	97.97	8.41
chr1	5195955	5196504	550	267	27	62.65	5.75
chr1	5231124	5231635	512	257	61	287	11.85
chr1	5296262	5297267	1006	283	49	102.03	7.3
chr1	5299232	5300512	1281	561	60	115.03	10.84
chr1	5323370	5324383	1013	704	55	116.33	9.73
chr1	5338931	5339705	775	331	61	218.71	10.4
chr1	5341990	5342612	623	270	42	133.08	7.3
chr1	5346536	5347337	802	317	64	231.73	11.73
chr1	5351479	5352563	1090	390	52	91.23	6.89
chr1	5364923	5365648	726	347	33	59.95	5.6
chr1	5366305	5367422	1118	574	47	64.99	5.76
chr1	5372711	5373383	673	297	30	59.55	4.65
chr1	5377105	5378902	1799	394	118	189.48	7.46
chr1	5391037	5391768	732	264	31	56.57	5.98
chr1	5409466	5410348	883	640	51	102.61	8.78
chr1	5431451	5432415	966	264	52	67.81	4.7
chr1	5458362	5459550	1189	584	43	55.91	7.3
chr1	5467895	5468734	840	302	53	152.24	11.07
chr1	5474660	5475737	1078	680	40	55.39	7.3
chr1	5481038	5481681	650	316	50	164.95	8.82
chr1	5497416	5498537	1122	499	87	210.96	12.33
chr1	5516715	5517282	568	267	31	75.05	6.42
chr1	5519216	5519643	428	215	30	108.4	5.95
chr1	5526069	5526729	661	255	51	148.85	8.96
chr1	5529910	5531231	1322	670	113	129.22	7.82
chr1	5546634	5547690	1057	679	57	50.73	4.47
chr1	5551401	5552271	871	326	148	283.82	8.33
chr1	5553702	5554467	766	409	71	74.25	4.14
chr1	5561264	5562693	1430	719	84	96.46	6.76
chr1	5568797	5569480	684	279	37	92.24	7.3
chr1	5577137	5578664	1528	775	100	116.79	6.67
chr1	5591583	5592721	1139	692	100	207.39	11.19
chr1	5600252	5601059	808	234	36	68.98	7.3
chr1	5604690	5606523	1835	508	81	75.93	4.66
chr1	5614336	5614954	619	349	53	208.03	11.07
chr1	5641977	5643034	1058	449	52	86.42	6.66
chr1	5645909	5646739	831	443	58	143.05	9.59
chr1	5652213	5652718	506	254	27	69.93	5.98
chr1	5683615	5684306	692	429	31	61.58	6.42
chr1	5709994	5711216	1223	473	148	301.41	11.63
chr1	5715168	5715841	674	358	28	50.7	5.31
chr1	5719207	5719930	724	307	31	57.54	5.09
chr1	5744718	5745665	948	604	128	371.44	12.96
chr1	5749702	5750323	622	267	27	52.7	5.31
chr1	5763877	5764641	765	371	60	136.75	8.21
chr1	5764775	5765495	721	398	46	79.99	5.7
chr1	5768815	5770271	1457	923	67	88.57	4.66
chr1	5789694	5791518	1823	1036	189	147.11	7.26
chr1	5792663	5793787	1125	702	89	169.12	10.08
chr1	5807264	5808936	1674	1414	101	154.3	8.47
chr1	5824786	5826022	1237	556	71	91.14	8.53
chr1	5830458	5831231	774	531	34	64.44	4.43
chr1	5835314	5836224	911	665	42	82.54	4.65
chr1	5843694	5844806	1113	569	58	116.75	6.77
chr1	5855765	5856444	680	309	91	386.5	12.38
chr1	5872245	5873146	902	211	35	53.96	4.65
chr1	5882545	5883560	1016	451	50	105.37	8.41
chr1	5907990	5908939	950	683	116	331.36	9.45
chr1	5916769	5917840	1072	679	54	88.44	8.31
chr1	5931094	5931840	747	310	30	50.67	5.75
chr1	5958401	5959072	672	295	43	111.57	6.87
chr1	5961334	5961834	501	251	29	86.15	6.42
chr1	5966078	5966875	794	235	40	74.44	5.05
chr1	5971441	5972638	1198	595	106	197.99	10.18
chr1	5976228	5977648	1425	275	89	147.43	8.54
chr1	5981666	5982498	833	261	34	57.41	6.2
chr1	5993255	5994186	932	641	50	118.5	10.4
chr1	5999872	6001089	1219	739	66	124.09	10.28
chr1	6004969	6007642	2674	1465	185	91.48	5.63
chr1	6011187	6011986	800	386	38	79.24	7.08
chr1	6019431	6020342	912	260	43	87.02	5.53
chr1	6028034	6029274	1241	684	58	88.65	7.69
chr1	6039883	6040895	1013	368	61	51.55	5.3
chr1	6041933	6042918	986	370	62	87.2	6.31
chr1	6048191	6048873	683	412	43	126.02	8.41
chr1	6054590	6055518	929	306	40	57.32	7
chr1	6057535	6058807	1273	648	123	284.62	13.42
chr1	6063501	6065474	1974	637	131	143.76	5.69
chr1	6074982	6075961	980	612	57	73.09	7.43
chr1	6077841	6078701	862	589	45	104.25	8.85
chr1	6083553	6084609	1057	500	71	73.94	4.8
chr1	6084825	6085242	418	210	32	83.84	4.74
chr1	6089019	6089548	530	266	32	91.82	7.08
chr1	6091111	6092321	1211	642	56	89.15	5.36
chr1	6100949	6101842	894	310	51	127.2	8.24
chr1	6122959	6123572	614	222	36	73.76	5.63
chr1	6134055	6134575	521	261	38	72.62	5.1
chr1	6135142	6136051	910	649	55	90.07	7.56
chr1	6141086	6142947	1862	670	199	102.72	4.62
chr1	6150320	6151521	1202	910	127	194.55	6.43
chr1	6155363	6156237	875	625	127	237.49	7.58
chr1	6164636	6166788	2153	1862	147	82.77	6.77
chr1	6168418	6170114	1697	1290	184	232.07	7.13
chr1	6186405	6187727	1323	1011	186	312.13	8.97
chr1	6191523	6192481	959	696	46	68.69	5.43
chr1	6196563	6197666	1104	466	107	144.61	8.47
chr1	6197918	6198788	872	611	78	103.2	7.06
chr1	6218465	6219144	680	430	32	56.75	5.7
chr1	6220312	6221157	846	531	49	95.36	7.46
chr1	6239644	6240641	998	562	61	126.75	5.02
chr1	6245957	6246674	718	435	64	149.19	6.98
chr1	6248743	6249608	866	607	46	67.7	6.98
chr1	6264176	6265331	1156	493	55	109.07	7.3
chr1	6358392	6358939	548	248	37	78.25	5.49
chr1	6372265	6372899	635	384	42	127.55	8.68
chr1	6380111	6381484	1374	668	93	155.67	10.41
chr1	6388591	6389578	988	527	117	285.9	9.33
chr1	6395183	6395967	785	519	83	193.58	9.33
chr1	6397953	6399121	1169	456	64	66.88	7.38
chr1	6403690	6404968	1279	523	63	90.78	6.75
chr1	6414261	6415456	1196	545	75	60.42	4.96
chr1	6420135	6421557	1423	703	95	125.82	6.05
chr1	6434639	6437751	3113	1606	339	107.07	6.25
chr1	6445670	6448199	2530	788	293	158.57	9.87
chr1	6452252	6452940	689	384	71	169	7.84
chr1	6453876	6454950	1075	570	68	53.47	4.93
chr1	6463299	6465512	2214	1144	125	112.82	5.61
chr1	6468836	6469719	884	299	57	123.62	7.85
chr1	6473879	6474666	788	313	39	80.95	6.42
chr1	6486239	6487285	1047	437	54	76.96	8.16
chr1	6490198	6490703	506	254	32	97.62	7.08
chr1	6496768	6498498	1731	358	242	347.51	10.97
chr1	6500967	6502281	1315	676	60	73.97	8.27
chr1	6505169	6506051	883	252	35	50.92	5.66
chr1	6510980	6512183	1204	912	122	192.33	8.52
chr1	6518197	6519988	1792	1329	170	280.77	11.24
chr1	6528336	6529000	665	315	44	77.34	5.97
chr1	6531800	6532720	921	262	68	76.19	6.6
chr1	6536902	6537531	631	365	27	51.58	5.09
chr1	6540453	6541206	754	434	48	140.72	9.52
chr1	6543844	6545586	1743	1234	203	325.63	7.16
chr1	6553873	6554629	757	498	45	122.73	9.74
chr1	6565910	6567980	2071	1385	226	282.63	10.67
chr1	6574107	6575446	1340	1075	85	90.87	4.24
chr1	6580756	6581825	1070	534	118	96.15	5.44
chr1	6581836	6583416	1581	578	172	120.14	4.09
chr1	6587016	6587901	886	505	43	90.7	7.75
chr1	6592225	6593092	868	583	51	112.87	8.08
chr1	6595752	6597238	1487	713	172	182.13	9.02
chr1	6619202	6620090	889	615	70	166.77	10.57
chr1	6628825	6629944	1120	483	138	302.22	12.47
chr1	6631688	6633440	1755	656	100	112.4	7.63
chr1	6644285	6645154	870	248	44	97.97	5.75
chr1	6657784	6658810	1027	507	68	164.34	8.58
chr1	6663110	6664221	1112	625	57	86.47	8.2
chr1	6668025	6669087	1063	682	59	139.83	11.28
chr1	6678258	6678846	589	326	48	174.2	9.96
chr1	6685340	6685824	485	243	35	121.32	7.34
chr1	6698587	6699743	1157	501	75	145.35	8.67
chr1	6705029	6706510	1482	352	145	146.5	6.99
chr1	6710886	6711663	778	519	51	142.51	9.95
chr1	6778823	6779287	465	233	25	69.93	5.53
chr1	6783591	6785390	1800	872	111	156.67	7.76
chr1	6799509	6800725	1217	524	71	50.77	5.52
chr1	6811851	6813532	1682	1424	84	68.42	4.87
chr1	6818227	6818868	642	380	50	180.37	10.62
chr1	6821667	6824114	2457	1463	255	205.17	7.6
chr1	6826349	6827707	1359	603	105	128.19	8.47
chr1	6837923	6838945	1023	428	71	133.46	7.16
chr1	6855484	6856809	1326	569	131	251.18	11.3
chr1	6862200	6863589	1397	659	136	80.29	6.24
chr1	6878362	6878845	484	243	35	105.3	6.47
chr1	6886141	6887043	903	238	42	83.62	6.86
chr1	6893147	6893722	576	275	33	89.81	6.86
chr1	6897990	6898776	787	268	58	156.47	9.7
chr1	6902834	6903713	880	381	43	50.42	5.75
chr1	6907354	6908573	1220	598	74	197	13.94
chr1	6922307	6923929	1623	630	126	175.39	8.64
chr1	6927384	6927903	520	261	35	115.74	7.75
chr1	6931667	6932437	771	540	36	73.91	6.2
chr1	6946806	6947431	626	365	28	56.66	5.53
chr1	6949712	6950884	1173	630	42	51.76	4.77
chr1	6961521	6962538	1018	746	84	115.43	7.17
chr1	6988978	6990017	1040	371	57	123.53	9.84
chr1	6996153	6997060	908	656	46	102.04	9.3
chr1	7017159	7017845	687	441	30	57.76	6.2
chr1	7056358	7057141	784	250	41	91.01	7.21
chr1	7071379	7072346	968	556	45	88.6	7.97
chr1	7075553	7076080	528	265	28	69.93	6.2
chr1	7078545	7079712	1168	578	45	65.24	6.86
chr1	7092199	7092996	798	471	37	74.84	6.64
chr1	7102190	7103076	887	254	37	63.66	5.09
chr1	7141141	7142306	1166	720	77	174.17	12.74
chr1	7144994	7145490	497	249	27	75.2	5.98
chr1	7171883	7172736	854	450	34	55.09	4.87
chr1	7209737	7210337	601	334	28	60.05	5.09
chr1	7215756	7216460	705	413	51	135.68	8.58
chr1	7225282	7225985	704	262	35	67.47	6.35
chr1	7234165	7234949	785	404	34	63.06	4.87
chr1	7243281	7244276	996	410	58	66.7	7.08
chr1	7246369	7247486	1120	418	72	64.89	4.61
chr1	7248019	7248881	863	278	59	77.46	6.18
chr1	7256096	7256632	537	263	35	109.36	7.52
chr1	7266592	7267990	1399	964	66	109.98	6.22
chr1	7285737	7286409	675	398	41	115.99	7.3
chr1	7301869	7302266	398	200	27	101.35	5.3
chr1	7307775	7309017	1243	733	110	276.66	12.88
chr1	7318447	7319540	1094	537	42	61.28	6.86
chr1	7335564	7336516	954	311	42	76.97	7.3
chr1	7344294	7345317	1024	597	46	85.73	6.42
chr1	7358746	7359708	963	697	90	242.7	11.75
chr1	7373082	7374041	960	606	42	64.87	6.22
chr1	7374135	7374994	860	512	45	81.27	7.69
chr1	7381525	7382232	708	255	33	67.81	5.49
chr1	7391938	7392759	822	327	38	76.19	6.64
chr1	7399633	7400157	525	263	56	219.95	9.86
chr1	7433662	7434290	629	386	42	92.19	6.6
chr1	7455448	7456901	1459	915	105	77.54	4.92
chr1	7453864	7454872	1009	438	92	101.64	6.88
chr1	7441409	7442309	901	241	65	171.33	11.52
chr1	7459963	7461190	1228	668	59	117.7	9.96
chr1	7474664	7475281	618	356	27	53.21	5.31
chr1	7510833	7511733	901	606	50	110.29	8.52
chr1	7524381	7525060	680	394	37	92.92	6.86
chr1	7545520	7546096	577	344	33	89.62	6.86
chr1	7552309	7554548	2240	1893	157	107.76	4.33
chr1	7556273	7557608	1336	680	115	243.93	12.35
chr1	7564960	7566253	1294	639	133	61.42	6.73
chr1	7577992	7578851	860	268	199	663.77	9.22
chr1	7582998	7583917	920	541	113	211.56	6.83
chr1	7611558	7612500	943	642	57	95.5	7.53
chr1	7622965	7623854	890	298	36	59.21	7.3
chr1	7636796	7638030	1235	956	102	179.3	7.61
chr1	7649566	7650841	1276	697	53	85.28	9.96
chr1	7655320	7656023	704	301	35	78.8	7.08
chr1	7660079	7661076	998	689	65	125.44	9.01
chr1	7678821	7679367	547	288	31	84.1	6.64
chr1	7693017	7694180	1164	596	54	103.37	6.42
chr1	7708150	7708968	819	261	33	54.89	6.86
chr1	7711269	7711753	485	243	29	91.82	6.42
chr1	7725165	7725885	721	385	31	57.91	5.98
chr1	7734548	7735242	695	407	86	319.01	11.94
chr1	7744169	7745128	960	285	119	382.85	13.01
chr1	7773668	7774487	820	231	45	111.24	9.52
chr1	7815331	7815880	550	297	25	53.06	5.09
chr1	7833519	7834386	868	471	34	53.6	5.31
chr1	7842612	7843424	813	222	39	82.13	7.08
chr1	7849557	7850083	527	264	35	105.86	7.51
chr1	7854735	7855268	534	268	31	78.51	6.36
chr1	7857157	7857731	575	309	29	68.78	5.98
chr1	7861427	7862064	638	255	38	100.48	7.52
chr1	7867885	7868815	931	621	40	71.14	7.75
chr1	7892507	7893495	989	596	43	76.98	8.41
chr1	7909626	7910337	712	255	30	54.69	6.2
chr1	7921398	7921889	492	247	30	91.82	6.64
chr1	7926018	7927026	1009	260	89	223.74	11.02
chr1	7946377	7947479	1103	348	54	111.88	7.75
chr1	7972907	7973768	862	435	64	211.28	10.85
chr1	7986202	7987080	879	401	35	56.39	6.2
chr1	8003286	8003740	455	228	39	175.96	8.63
chr1	8023517	8024235	719	458	55	185.11	11.41
chr1	8033207	8034441	1235	560	46	62.43	7.3
chr1	8050100	8051229	1130	518	49	78.29	6.5
chr1	8055735	8056600	866	266	59	182.81	11.73
chr1	8063759	8064423	665	261	38	101	7.97
chr1	8091635	8092437	803	507	55	172.47	9.96
chr1	8101389	8101859	471	236	30	76.5	5.18
chr1	8102378	8103338	961	295	65	137.97	9.84
chr1	8108531	8109260	730	508	30	52.59	5.75
chr1	8128594	8129465	872	258	47	84.89	7.43
chr1	8134125	8135291	1167	478	66	144.87	9.13
chr1	8137226	8138247	1022	644	84	269.76	12.05
chr1	8169085	8170505	1421	879	93	153.09	6.07
chr1	8177949	8178774	826	234	33	54.12	6.86
chr1	8198209	8199006	798	262	50	143.33	9.74
chr1	8222931	8223577	647	338	70	248.24	9.81
chr1	8243229	8243945	717	347	53	180.58	10.4
chr1	8255679	8256779	1101	622	57	126.89	10.4
chr1	8267741	8268306	566	329	26	55.53	5.31
chr1	8277441	8278279	839	607	33	52.73	6.86
chr1	8283622	8284132	511	256	39	123.62	7.58
chr1	8284483	8285339	857	437	44	53.18	5.44
chr1	8294943	8295548	606	260	55	226.81	11.73
chr1	8305524	8306332	809	442	69	238.32	11.71
chr1	8309225	8309754	530	266	56	232.82	10.88
chr1	8310527	8311018	492	247	25	52.98	5.07
chr1	8317200	8318411	1212	738	122	285.18	12.85
chr1	8320269	8321494	1226	715	66	110.21	10.13
chr1	8324593	8325860	1268	679	49	66.4	8.58
chr1	8355644	8356543	900	645	50	92.42	8.43
chr1	8371161	8371809	649	267	40	109.81	7
chr1	8377430	8378154	725	481	36	80.55	7.3
chr1	8380791	8381600	810	520	49	135.13	9.52
chr1	8395804	8396665	862	602	84	252.47	8.02
chr1	8405965	8406953	989	283	51	114.39	10.62
chr1	8418789	8419577	789	234	32	50.13	6.2
chr1	8501585	8502406	823	241	38	64.28	7.15
chr1	8502506	8503652	1145	703	44	54.04	7.91
chr1	8511939	8513043	1105	755	61	146.84	8.19
chr1	8520035	8520949	915	648	47	81.13	7.39
chr1	8545654	8546674	1021	708	39	57.21	6.2
chr1	8560966	8561836	871	268	41	82.38	5.27
chr1	8613408	8614368	961	344	105	326.4	13.63
chr1	8619276	8620148	874	253	57	168.82	10.18
chr1	8626490	8627526	1037	570	62	103.94	8.35
chr1	8634882	8635490	609	343	31	62.6	6.01
chr1	8644957	8646744	1788	1070	131	134.78	8.01
chr1	8682045	8683190	1146	375	75	118.14	5.98
chr1	8702474	8703511	1038	629	41	63.17	5.53
chr1	8705473	8706010	538	288	33	97.21	7.08
chr1	8720784	8721762	979	614	79	247.01	13.27
chr1	8727114	8727927	814	225	58	178.14	11.74
chr1	8731241	8732477	1237	702	67	155.9	11.73
chr1	8776353	8777354	1002	329	56	128.72	9.64
chr1	8782135	8783033	899	247	42	84.17	4.87
chr1	8800188	8801162	975	517	41	70.15	5.75
chr1	8812936	8813991	1056	754	76	239.78	11.06
chr1	8823195	8824015	821	266	50	79.63	6.72
chr1	8828562	8829550	989	603	63	155.84	11.19
chr1	8837304	8838312	1009	708	108	296.38	13.01
chr1	8840322	8841670	1349	822	76	119.12	6.93
chr1	8870348	8871000	652	387	35	87.14	6.64
chr1	8877180	8878038	859	615	36	62.73	6.2
chr1	8883942	8885475	1534	739	75	58.02	4.36
chr1	8890973	8891711	739	317	32	60.04	5.98
chr1	8896768	8897680	913	464	55	149.11	9.96
chr1	8900830	8901723	894	648	38	67.04	6.64
chr1	8907349	8908509	1161	518	56	60.63	7.46
chr1	8918600	8919481	882	310	45	72.57	7.29
chr1	8920590	8921569	980	654	42	59.11	5.83
chr1	8936244	8937213	970	282	63	113.88	9.25
chr1	8951477	8952812	1336	1094	70	121.87	6.54
chr1	8998956	8999752	797	544	64	202.58	12.5
chr1	9009213	9009721	509	255	28	75.2	6.2
chr1	9014965	9016181	1217	623	70	158.7	11.89
chr1	9018164	9019096	933	673	44	88.77	9.52
chr1	9046981	9047707	727	243	66	143.5	8.23
chr1	9059875	9060685	811	557	84	297.25	13.4
chr1	9084800	9086633	1834	1386	127	107.39	6.43
chr1	9088952	9089534	583	291	46	96.16	5.58
chr1	9089874	9090462	589	267	60	167.51	7.94
chr1	9094163	9094685	523	262	27	64.81	5.98
chr1	9097807	9098398	592	266	49	145.81	8.07
chr1	9103922	9105331	1410	815	112	218.59	10.29
chr1	9111355	9112976	1622	951	115	182.53	6.76
chr1	9120351	9121170	820	237	32	50.79	6.2
chr1	9140884	9141795	912	579	54	143.67	5.98
chr1	9153903	9155286	1384	930	90	133.52	6.84
chr1	9158662	9159404	743	339	35	73.12	6.42
chr1	9168346	9169237	892	641	57	139.23	9.62
chr1	9174039	9175868	1830	920	238	323.76	8.74
chr1	9183423	9184331	909	427	38	65.28	5.98
chr1	9207112	9208130	1019	327	93	238.53	12
chr1	9230651	9233426	2776	2032	220	121.2	6.14
chr1	9244018	9246159	2142	430	86	66.19	4.24
chr1	9254093	9254677	585	292	33	71.59	5.84
chr1	9280173	9280884	712	246	29	50.49	5.75
chr1	9289193	9289689	497	249	41	155.28	8.31
chr1	9291411	9292313	903	300	40	56.03	5.6
chr1	9301811	9303385	1575	609	125	207.51	8.07
chr1	9308364	9309102	739	299	65	138.94	6.26
chr1	9328475	9329441	967	593	65	120.38	7.74
chr1	9336594	9337301	707	271	80	227.47	7.56
chr1	9341496	9342230	735	377	38	55.25	5.35
chr1	9343357	9344239	883	604	36	58.02	7.16
chr1	9348176	9350478	2303	1704	132	125.02	4.99
chr1	9352725	9354034	1310	708	67	133.41	12.58
chr1	9358428	9359988	1561	901	146	150.15	8.21
chr1	9364166	9365468	1303	694	74	125.25	8.9
chr1	9392665	9393696	1032	399	66	74.48	6.66
chr1	9404550	9405455	906	268	64	158.75	8.35
chr1	9415353	9415862	510	256	35	101.35	6.87
chr1	9417520	9418558	1036	674	129	253.35	8.22
chr1	9426182	9426691	510	256	33	103.54	7.3
chr1	9430378	9431274	897	250	63	146.38	10.29
chr1	9435694	9436801	1108	476	48	83.99	8.41
chr1	9448281	9449026	746	395	51	140.51	9.03
chr1	9454012	9455069	1058	708	58	125.49	7.79
chr1	9471455	9472789	1335	907	127	284.65	8
chr1	9475163	9476455	1293	626	45	53.75	5.75
chr1	9481769	9482338	570	254	25	50.42	5.09
chr1	9487818	9488649	832	293	79	152.33	7.6
chr1	9488942	9489562	621	364	43	61.65	4.79
chr1	9496531	9497625	1095	647	44	68.95	7.08
chr1	9511287	9512449	1163	596	78	101.16	7.14
chr1	9519246	9520362	1117	789	149	280.84	6.87
chr1	9526996	9527857	862	568	47	114.61	8.41
chr1	9541814	9542687	874	503	47	79.59	4.53
chr1	9551142	9551860	719	248	69	237.79	11.79
chr1	9555443	9556678	1236	644	50	77.59	8.19
chr1	9559855	9560637	783	459	70	177.07	8.04
chr1	9563966	9564602	637	313	60	191.9	9.41
chr1	9578374	9579299	926	313	38	63.34	5.98
chr1	9585285	9585928	644	279	71	293.83	12.69
chr1	9590133	9592015	1883	1128	157	180.53	6.28
chr1	9593371	9594528	1158	450	90	94.05	6.58
chr1	9597250	9598299	1050	311	131	308.77	11.42
chr1	9608906	9610619	1714	990	212	345.29	9.09
chr1	9626802	9628076	1275	672	60	77.16	8.54
chr1	9635391	9636273	883	257	39	51.7	6.34
chr1	9644293	9645555	1263	600	73	101.97	9.33
chr1	9647229	9648265	1037	319	92	272.62	13.95
chr1	9656916	9658031	1116	346	68	105.7	5.55
chr1	9663836	9664764	929	435	50	73.14	5.79
chr1	9668737	9669716	980	279	140	362.99	12.21
chr1	9673852	9675129	1278	650	84	107.95	9.39
chr1	9680875	9681837	963	666	41	71.56	7.52
chr1	9693043	9694130	1088	640	65	122.65	7.26
chr1	9701115	9702470	1356	722	73	134.6	11.23
chr1	9709947	9710819	873	456	46	65.69	4.83
chr1	9717705	9718569	865	432	34	50.04	4.66
chr1	9721341	9722556	1216	486	76	107.24	8.42
chr1	9745398	9745997	600	268	29	62.22	6
chr1	9746140	9746970	831	264	35	52.63	6.71
chr1	9748676	9749724	1049	727	78	189.14	10.93
chr1	9758228	9759470	1243	512	126	79.88	6.43
chr1	9760407	9761512	1106	364	142	160.61	6.62
chr1	9765978	9768091	2114	1351	182	113.53	6.22
chr1	9793949	9796835	2887	1300	158	70.99	5.5
chr1	9802598	9803715	1118	704	64	82.93	8.1
chr1	9805918	9807351	1434	754	118	170.03	9.71
chr1	9809308	9810621	1314	1099	85	171.17	6.61
chr1	9815074	9816891	1818	1480	163	158.92	7.45
chr1	9820451	9822685	2235	1625	143	58.33	6.13
chr1	9828430	9829501	1072	706	60	81.08	6.77
chr1	9841452	9842391	940	643	132	422.36	11.7
chr1	9858005	9859101	1097	808	57	77.88	5.16
chr1	9868301	9869256	956	460	97	155.49	7.91
chr1	9873409	9873966	558	292	81	159.84	5.99
chr1	9879839	9881059	1221	582	55	87.08	7.5
chr1	9884125	9885022	898	632	48	81.46	4.4
chr1	9888489	9889830	1342	698	88	103.31	6.63
chr1	9899194	9900469	1276	527	125	140.14	8.59
chr1	9901585	9902987	1403	633	107	71.38	4.11
chr1	9911428	9912121	694	269	61	93.86	5.36
chr1	9939765	9940674	910	669	35	53.14	4.65
chr1	9933584	9934955	1372	671	77	89.23	7.35
chr1	9930749	9931753	1005	549	56	101.04	8.78
chr1	9925648	9926866	1219	556	80	196.09	7.5
chr1	9921971	9923794	1824	1184	173	51.28	5.08
chr1	9944250	9945257	1008	413	85	198.28	8.97
chr1	9957995	9959336	1342	1018	80	96.72	4.22
chr1	9965145	9965940	796	315	34	61.72	6.64
chr1	9971263	9971890	629	329	40	106.74	7.55
chr1	9988148	9989943	1796	1108	132	186.76	9.58
chr1	10002687	10003342	656	407	35	78.18	6.36
chr1	10019346	10020401	1056	470	62	137.97	10.8
chr1	10041179	10042845	1667	939	88	77.45	6.26
chr1	10049268	10051060	1793	456	290	283.09	5.64
chr1	10057325	10058208	884	643	59	71.13	4.87
chr1	10072707	10073868	1162	686	85	134.99	9.99
chr1	10075694	10076863	1170	642	124	139.93	7.28
chr1	10076878	10080225	3348	2287	258	81.28	5.45
chr1	10083890	10084614	725	411	76	228.35	9.54
chr1	10090628	10091895	1268	603	143	309.29	11.21
chr1	10094858	10095309	452	227	28	65.49	4.54
chr1	10096421	10097304	884	245	56	86.57	7.12
chr1	10103723	10104633	911	644	60	70.21	5.47
chr1	10106030	10106893	864	538	59	54.77	5.27
chr1	10119892	10120401	510	256	40	154.98	8.85
chr1	10125818	10126415	598	267	27	55.82	5.53
chr1	10131417	10132168	752	244	54	137.43	9.33
chr1	10137713	10138574	862	566	62	94.21	5.13
chr1	10139780	10140713	934	415	63	71.45	4.34
chr1	10147343	10149136	1792	392	86	52.31	4.44
chr1	10156323	10157670	1349	521	117	114.17	6.48
chr1	10176401	10177768	1368	726	90	110.47	8.64
chr1	10179625	10181842	2218	1841	100	120.45	7.39
chr1	10187142	10188462	1321	605	81	104.9	8.37
chr1	10200864	10201801	938	475	81	80.74	6.1
chr1	10205779	10206982	1204	701	71	90.52	7.57
chr1	10222588	10224327	1753	1246	104	102.03	6.52
chr1	10234366	10235678	1313	677	71	149.88	10.78
chr1	10237858	10238377	520	261	35	115.74	7.75
chr1	10246803	10247690	888	254	35	55.43	5.09
chr1	10263537	10265391	1855	1577	111	128.78	6.86
chr1	10268883	10269798	916	656	42	74.03	7.88
chr1	10274143	10274910	768	488	37	79.05	5.75
chr1	10275231	10275846	616	267	41	116.39	8.19
chr1	10277877	10278680	804	354	37	50.77	4.93
chr1	10279162	10280366	1205	521	58	77.36	8.88
chr1	10334316	10335835	1520	301	153	255.29	7.64
chr1	10337856	10338603	748	271	42	107.81	5.31
chr1	10347352	10348147	796	508	88	241.93	7.69
chr1	10417375	10418248	874	264	39	73.86	6.42
chr1	10444065	10445257	1193	744	58	112.61	8.36
chr1	10447469	10448712	1239	597	90	153.71	7.22
chr1	11047945	11049212	1268	543	55	94.56	6.2
chr1	10363670	10364847	1178	480	62	131.83	10.18
chr1	10378803	10379776	974	536	64	98.24	7.05
chr1	10384656	10385612	957	404	58	87.17	6.76
chr1	10398439	10399234	796	274	43	97.57	8.39
chr1	10403115	10404113	999	714	99	130.84	8.16
chr1	10411024	10411933	910	648	99	258.63	9.39
chr1	10453121	10453864	745	323	62	107.89	6.22
chr1	10453966	10454763	798	293	61	103.27	7.08
chr1	10461347	10462411	1065	445	64	63.1	4.08
chr1	10505468	10506433	966	652	68	149.75	8.18
chr1	10522406	10523450	1045	264	79	102.13	7.12
chr1	10523956	10524510	555	290	46	78.87	5.01
chr1	10527701	10528803	1103	429	64	161.69	11.63
chr1	10545348	10546055	708	303	43	73.71	6.17
chr1	10546460	10547516	1057	414	52	60.35	6.59
chr1	10570756	10571561	806	262	34	60.52	7.08
chr1	10581139	10581630	492	247	31	88.51	6.65
chr1	10588104	10588701	598	284	32	75.29	6.2
chr1	10595910	10596922	1013	607	83	186.65	10.56
chr1	10484892	10485475	584	261	29	67.39	5.75
chr1	10622460	10623453	994	383	128	394.7	9.27
chr1	10642854	10644102	1249	609	91	197.41	13.47
chr1	10648380	10649220	842	354	52	135	7.46
chr1	10666805	10667640	836	263	35	56	5.87
chr1	10671102	10671678	577	324	37	93.33	6.22
chr1	10681144	10681691	548	293	26	58.07	5.53
chr1	10686153	10687098	946	294	82	256.28	13.81
chr1	10717300	10717814	515	258	50	215.61	10.36
chr1	10719723	10720230	508	255	30	81.83	6.36
chr1	10724476	10725223	748	260	31	54.68	6.42
chr1	10733754	10734635	882	261	38	68.49	4.87
chr1	10746072	10747410	1339	726	67	72.18	8.19
chr1	10758203	10759301	1099	630	73	150.87	10.16
chr1	10782408	10783308	901	640	37	62.06	5.53
chr1	10788818	10790185	1369	644	80	180.46	13.38
chr1	10799867	10800364	498	250	52	227.46	10.21
chr1	10808881	10809904	1024	473	49	99.46	9.07
chr1	10842410	10843150	743	326	177	741.46	15.64
chr1	10875440	10876232	793	373	32	53.71	5.09
chr1	10882983	10884230	1248	735	54	92.71	7.52
chr1	10908692	10909289	598	311	38	114.25	7.75
chr1	10927004	10927919	916	657	45	95.94	7.97
chr1	10962984	10963684	701	448	36	84.27	7.3
chr1	10967414	10968077	664	400	52	150.69	8.25
chr1	10969887	10970954	1068	353	53	63.68	5.85
chr1	11013638	11014804	1167	633	86	156.34	10.16
chr1	11041540	11042054	515	258	34	109.58	7.52
chr1	11044088	11045089	1002	625	41	67.07	6.64
chr1	11054818	11055623	806	395	45	97.08	7.07
chr1	11063762	11065069	1308	698	53	81.75	10.18
chr1	11070951	11072359	1409	829	77	100.67	6.17
chr1	11085654	11086538	885	620	63	201.71	12.95
chr1	11104352	11105235	884	663	48	116.13	8.41
chr1	11114686	11116094	1409	748	73	128.79	7.69
chr1	11164043	11164631	589	221	27	57.03	5.75
chr1	11173489	11174109	621	358	46	159.16	9.07
chr1	11177815	11178352	538	276	35	109.14	7.52
chr1	11223872	11225183	1312	1056	100	221.77	7.46
chr1	11235980	11237115	1136	561	50	78.65	6.97
chr1	11246112	11246782	671	268	89	361.91	12.34
chr1	11250339	11252027	1692	990	64	53.57	6.1
chr1	11255934	11256455	522	262	27	64.81	5.98
chr1	11259669	11260254	586	312	27	57.45	5.09
chr1	11279660	11280640	981	277	42	73.66	7.3
chr1	11289164	11290058	895	580	59	176.3	11.95
chr1	11343087	11343810	724	265	30	53.28	6.2
chr1	11349384	11350128	745	265	36	77.59	7.52
chr1	11355409	11356361	953	484	37	56.45	5.31
chr1	11386698	11387176	479	240	28	86.15	6.2
chr1	11390430	11390984	555	292	33	93.81	6.86
chr1	11394121	11394929	809	265	40	51.28	6.06
chr1	11397371	11398288	918	492	38	59.8	6.57
chr1	11403395	11404520	1126	669	43	61.87	8.19
chr1	11414668	11415766	1099	356	114	316.29	13.72
chr1	11420945	11421563	619	358	31	71.97	6.42
chr1	11423690	11424514	825	234	40	73.7	7.62
chr1	11426050	11426746	697	405	31	60.93	5.75
chr1	11440579	11441460	882	661	37	64.24	6.64
chr1	11497366	11498238	873	375	34	53.08	6.2
chr1	11512265	11512962	698	456	33	70.02	6.42
chr1	11535931	11536484	554	291	38	71.1	5.13
chr1	11554605	11555303	699	263	34	74.66	5.53
chr1	11567461	11568319	859	538	67	62.05	4.91
chr1	11569566	11570399	834	379	102	245.32	9.9
chr1	11610623	11611344	721	333	40	101.81	7.3
chr1	11615471	11616336	866	246	48	119.22	9.96
chr1	11629586	11630515	930	537	69	138.74	5.67
chr1	11648548	11649549	1003	522	59	136.16	9.63
chr1	11680765	11681244	480	241	26	75.2	5.75
chr1	11684183	11685136	955	491	70	223.74	7.93
chr1	11718758	11719508	751	493	76	215.42	10.05
chr1	11729578	11730276	699	362	117	535.44	15.1
chr1	11737584	11738232	649	288	29	53.72	5.75
chr1	11741232	11742192	961	377	48	103.83	8.85
chr1	11763705	11764221	517	259	25	55	5.53
chr1	11783700	11784428	737	425	35	73.96	6.2
chr1	11801067	11801549	483	242	35	128.39	7.75
chr1	11818532	11819176	645	358	47	159.61	8.63
chr1	11865677	11866625	950	684	57	147.49	11.79
chr1	11869118	11869984	867	597	54	152.54	10.4
chr1	11894939	11895809	871	634	48	84.28	6.8
chr1	11896343	11896980	638	362	31	55.67	5.02
chr1	11912658	11913241	584	268	30	72.43	6.2
chr1	11949780	11950467	688	450	32	66.72	6.64
chr1	11954180	11954690	511	256	25	59.83	5.53
chr1	11975669	11976154	486	244	40	168.87	8.85
chr1	11991080	11991604	525	263	32	84.99	6.63
chr1	11991921	11992483	563	248	39	109.46	7.22
chr1	12000340	12001304	965	307	61	160.35	11.4
chr1	12016509	12017325	817	375	51	145.27	9.74
chr1	12019833	12020918	1096	501	40	53.7	5.53
chr1	12032971	12033468	498	250	26	64.81	5.75
chr1	12045550	12046173	624	363	42	132.85	8.85
chr1	12277504	12277927	424	213	31	134.88	6.86
chr1	12270636	12271463	828	372	111	407.77	9.26
chr1	12254202	12255179	978	660	50	111.11	10.18
chr1	12240862	12241448	587	265	60	272.03	12.84
chr1	12220215	12221080	866	263	35	57.81	5.98
chr1	12196575	12197197	623	263	43	139.33	9.07
chr1	12178304	12178831	528	265	48	188.36	10.06
chr1	12058421	12058895	475	238	36	141.48	7.97
chr1	12067454	12067996	543	276	66	273.96	11.16
chr1	12071972	12072856	885	206	38	68.12	7.08
chr1	12077520	12078625	1106	580	77	171.28	11.43
chr1	12091913	12092975	1063	516	93	113.81	7.56
chr1	12094552	12095676	1124	632	48	82.07	9.3
chr1	12098640	12099837	1204	460	94	253.04	12.5
chr1	12103944	12105208	1266	660	46	59.56	8.19
chr1	12110249	12110955	707	284	46	138.82	8.63
chr1	12115533	12116445	913	267	42	82.27	8.85
chr1	12121053	12121833	781	265	60	203.63	10.84
chr1	12130952	12131529	578	321	38	118.59	7.97
chr1	12139969	12140965	997	472	39	59.65	4.21
chr1	12150255	12150805	551	289	50	207.72	10.84
chr1	12499577	12500433	857	508	40	80.66	7.08
chr1	12495839	12496908	1070	532	40	56.15	7.75
chr1	12480707	12481626	920	249	40	72.48	6.64
chr1	12461682	12462398	717	414	66	220.84	7.82
chr1	12341043	12341794	752	305	34	67.28	5.53
chr1	12356081	12356618	538	299	43	161.31	9.3
chr1	12378835	12379691	857	626	35	58.81	5.53
chr1	12383110	12384382	1273	583	46	54.1	6.57
chr1	12426792	12427717	926	402	37	59.3	5.53
chr1	12540763	12541482	721	463	37	86.16	7.52
chr1	12544463	12545266	804	548	34	60.76	6.86
chr1	12552734	12553298	565	307	28	65.32	5.53
chr1	12557128	12557992	865	598	35	57.92	5.98
chr1	12604407	12605073	667	381	37	95.19	7.52
chr1	12680844	12681408	565	311	27	60.42	5.75
chr1	12693375	12694352	979	507	68	195.36	12.71
chr1	12704688	12706393	1706	632	85	131.49	9.51
chr1	12708653	12709367	715	303	43	119.55	8.85
chr1	12713624	12714151	528	265	31	80.61	6.86
chr1	12746588	12747779	1192	549	50	82.5	10.4
chr1	12761907	12762531	625	333	59	194.83	8.65
chr1	12773238	12773760	523	262	61	309.27	13.5
chr1	12820719	12821271	553	300	27	54	5.3
chr1	12826555	12827293	740	260	33	64.34	7.08
chr1	12869797	12871176	1380	787	91	189.85	11.13
chr1	12879479	12880262	784	287	37	76.78	7.08
chr1	12883823	12884463	641	353	31	68.65	5.75
chr1	12935208	12935989	782	482	51	138.02	9.13
chr1	12937526	12938359	834	230	39	62.57	7.04
chr1	12958555	12959183	629	242	52	190.9	11.07
chr1	12994459	12994986	528	265	28	69.93	6.2
chr1	12997257	12997752	496	249	31	97.62	6.86
chr1	12998542	12999066	525	263	31	80.61	6.86
chr1	13068030	13068542	513	257	43	168.87	9.52
chr1	13102637	13103460	824	559	54	128.45	8.78
chr1	13104505	13105287	785	523	44	80.41	6.97
chr1	13110100	13111277	1178	529	49	79.98	7.97
chr1	13136498	13137524	1026	313	60	63.67	6.9
chr1	13186315	13186815	501	251	30	91.82	6.64
chr1	13209769	13210690	923	285	72	223.41	13.16
chr1	13219073	13219819	748	248	46	130.23	9.52
chr1	13232417	13233368	955	282	53	121.44	10.06
chr1	13236204	13236869	666	264	45	141.84	9.3
chr1	13239095	13240150	1056	691	49	92.23	8.03
chr1	13246646	13247408	763	500	41	99.88	7.52
chr1	13260481	13261282	802	259	32	52.72	5.75
chr1	13275932	13276415	484	243	38	154.98	8.41
chr1	13286651	13287343	693	473	33	70.73	6.42
chr1	13307474	13308053	580	300	26	53.64	5.31
chr1	13314955	13315962	1008	265	50	106.55	8.85
chr1	13318497	13319053	557	262	40	136.13	8.63
chr1	13337380	13338447	1068	682	68	193.01	11.07
chr1	13344060	13345237	1178	565	55	101.07	10.29
chr1	13358041	13358613	573	263	61	216.87	9.57
chr1	13361731	13362717	987	323	37	53.05	4.87
chr1	13388406	13389281	876	261	46	107.09	9.74
chr1	13400215	13400896	682	275	48	156.94	7.97
chr1	13409828	13410345	518	260	34	109.58	7.52
chr1	13448837	13449840	1004	686	55	132.51	9.96
chr1	13483157	13484169	1013	462	55	130.98	8.85
chr1	13497788	13498467	680	428	45	138.68	8.19
chr1	13508261	13509149	889	634	41	80.92	8.63
chr1	13556030	13556760	731	401	34	70.11	6.64
chr1	13564433	13565002	570	289	29	69.57	5.98
chr1	13570774	13571430	657	378	44	137.71	9.07
chr1	13575659	13576575	917	624	42	81.74	8.19
chr1	13591588	13592236	649	356	101	499.98	15.46
chr1	13617494	13618414	921	268	60	175.02	12.29
chr1	13631945	13632558	614	359	88	442.17	15.89
chr1	13637860	13638420	561	295	33	92.65	7.08
chr1	13680485	13681247	763	278	38	84.64	5.75
chr1	13713034	13713664	631	370	31	70.14	6.42
chr1	13718576	13719682	1107	523	41	56.29	6.86
chr1	13731064	13731897	834	303	52	119.4	9.14
chr1	13766639	13767359	721	485	44	124.1	8.19
chr1	13775657	13776555	899	663	40	75.11	6.64
chr1	13796145	13796865	721	293	36	81.16	6.64
chr1	13828425	13829395	971	581	52	122.39	9.52
chr1	13840311	13840851	541	278	28	69.11	5.98
chr1	13847698	13848379	682	259	34	77.21	6.86
chr1	13850255	13851161	907	263	37	61.38	7.52
chr1	13876727	13877246	520	261	30	80.61	6.64
chr1	13886207	13886946	740	334	58	175.97	9.23
chr1	13887290	13887755	466	234	27	60.79	5.09
chr1	13896983	13898154	1172	567	48	76.57	8.85
chr1	13907301	13908288	988	636	43	77.1	7.3
chr1	13929116	13929669	554	266	26	57.21	5.31
chr1	13966065	13966871	807	302	33	51.37	5.66
chr1	13981805	13982312	508	255	26	64.81	5.75
chr1	13985135	13986025	891	260	40	76.13	5.75
chr1	13998034	13998781	748	496	38	86.95	6.86
chr1	14000750	14001320	571	307	25	50.29	4.65
chr1	14033414	14034615	1202	619	49	66.1	9.33
chr1	14043172	14043795	624	266	35	92.03	7.3
chr1	14043873	14044638	766	244	34	61.06	5.09
chr1	14047848	14048793	946	389	41	73.61	6.86
chr1	14074416	14075063	648	356	29	58.31	5.09
chr1	14088176	14088793	618	319	36	87.38	6.62
chr1	14115762	14116270	509	255	39	148.18	8.63
chr1	14128944	14129814	871	268	62	169.44	10.28
chr1	14153097	14153968	872	327	38	69.71	6.86
chr1	14167283	14167819	537	291	49	204.89	10.62
chr1	14181606	14182271	666	259	49	103.4	6.88
chr1	14198549	14199066	518	260	30	86.15	6.64
chr1	14225480	14226023	544	292	28	68.63	5.98
chr1	14239767	14240451	685	325	35	81.74	6.2
chr1	14261753	14262522	770	232	33	60.57	7.08
chr1	14268366	14269122	757	481	44	117.13	9.07
chr1	14293391	14294165	775	336	51	154.19	8.63
chr1	14300978	14301617	640	259	40	105.98	6.78
chr1	14344089	14344729	641	389	36	94.41	7.08
chr1	14356159	14357119	963	647	59	143.61	9.23
chr1	14362539	14363353	815	562	61	194.36	11.82
chr1	14371189	14372426	1238	661	99	270.31	14.47
chr1	14374554	14375087	534	268	35	103.54	7.75
chr1	14396924	14397858	935	566	41	74.97	7.97
chr1	14403989	14404611	623	250	51	160.63	8.31
chr1	14415966	14416622	657	400	57	223.46	11.85
chr1	14459326	14459985	660	298	41	119.03	7.75
chr1	14542640	14543544	905	320	46	102.5	6.86
chr1	14550244	14551024	781	256	39	86.84	8.19
chr1	14562715	14563206	492	247	28	80.61	6.2
chr1	14578331	14578869	539	266	64	325	13.94
chr1	14583982	14585238	1257	642	46	60.38	7.08
chr1	14626140	14626847	708	383	41	109.63	7.3
chr1	14644988	14645712	726	254	44	123.1	8.63
chr1	14717387	14718135	749	391	35	72.28	6.64
chr1	14752410	14753203	794	266	43	102.45	8.89
chr1	14758895	14759878	984	339	37	53.34	6.2
chr1	14766844	14767656	813	489	45	83.26	6.83
chr1	14771721	14772605	885	494	66	164.85	10.01
chr1	14774001	14774703	703	295	39	61.91	5.42
chr1	14784807	14785600	794	508	44	110.43	7.75
chr1	14798408	14799220	813	574	38	77.42	5.09
chr1	14812437	14813630	1194	560	45	59.02	7.97
chr1	14827553	14828307	755	513	36	76.15	7.52
chr1	14839440	14840120	681	427	34	77.36	5.98
chr1	14845818	14846757	940	282	42	78.74	7.75
chr1	14854995	14855654	660	266	39	107.52	7.52
chr1	14872408	14873205	798	382	46	104.88	7.54
chr1	14888301	14890597	2297	1152	123	99.14	5.78
chr1	14934082	14934898	817	310	33	55.11	5.98
chr1	14937247	14937810	564	261	61	284.56	12.8
chr1	14939978	14940485	508	255	43	175.96	9.52
chr1	14974817	14976105	1289	661	72	118.93	10.44
chr1	15040559	15042041	1484	1205	55	68.11	5.53
chr1	15014882	15015483	603	267	90	488.72	17.64
chr1	15067397	15068304	908	311	37	61.27	7.52
chr1	15093990	15094489	500	251	33	109.58	7.3
chr1	15097383	15097904	522	262	49	209.11	10.63
chr1	15128283	15129567	1285	598	58	105.49	10.62
chr1	15158323	15159127	806	296	36	69.23	5.98
chr1	15167022	15168046	1025	476	55	90.74	8.25
chr1	15218568	15219341	774	477	40	87.91	7.08
chr1	15229101	15229885	785	501	57	178.96	11.11
chr1	15234106	15235039	934	265	39	62.45	6.86
chr1	15236897	15237409	513	257	39	141.48	8.63
chr1	15257892	15258486	595	300	39	99.11	6.9
chr1	15253794	15254701	908	655	37	61.27	5.75
chr1	15241955	15242918	964	542	39	63.18	5.98
chr1	15107672	15108768	1100	655	46	76.51	7.75
chr1	15275884	15276908	1025	378	63	108.56	8.85
chr1	15425153	15426024	872	297	54	64.89	5.97
chr1	15427252	15428288	1037	607	103	209.54	8.88
chr1	15444407	15444975	569	268	36	108.47	7.75
chr1	15448585	15449621	1037	264	82	113.77	6.51
chr1	15450448	15451488	1041	467	68	53.62	6.22
chr1	15518153	15519043	891	310	44	75.62	6.85
chr1	15520363	15521067	705	330	37	59.05	5.71
chr1	15531030	15531881	852	450	62	94.34	5.84
chr1	15545715	15546322	608	349	65	285.61	12.92
chr1	15549333	15549896	564	258	41	140.88	8.85
chr1	15603462	15604379	923	608	62	98.89	6.78
chr1	15606144	15607002	859	265	46	53.6	6.27
chr1	15612628	15613358	731	235	35	74.82	6.86
chr1	15615898	15616768	871	450	34	53.29	5.98
chr1	15622997	15623843	847	605	59	169.99	11.76
chr1	15648274	15649384	1112	403	99	252.49	12.44
chr1	15652911	15653375	465	233	35	141.48	7.75
chr1	15661063	15661747	685	267	30	58.01	5.98
chr1	15679970	15680993	1024	652	46	85.73	9.52
chr1	15699626	15700749	1124	668	88	244.15	12.02
chr1	15703715	15704265	551	264	34	100.4	7.3
chr1	15712074	15712751	678	368	56	211.67	11.29
chr1	15718757	15719389	633	282	43	119.87	7.86
chr1	15748601	15749656	1056	610	47	86.08	7.3
chr1	15757565	15758398	834	339	40	55.35	5.65
chr1	15769826	15770649	824	281	45	78.66	6.1
chr1	15776654	15777216	563	247	25	51.33	5.09
chr1	15804207	15804797	591	326	34	92.57	7.08
chr1	15825585	15826427	843	263	43	97.16	7.3
chr1	15829686	15830408	723	251	33	66.58	5.98
chr1	15849281	15850190	912	562	35	52.94	6.2
chr1	15887928	15889511	1584	268	66	57.74	3.73
chr1	15890399	15891396	998	320	64	92.71	7.01
chr1	15921253	15921914	662	322	71	319.93	13.57
chr1	15927454	15928315	862	489	67	210.6	11.51
chr1	15943051	15943595	545	275	44	166.26	9.3
chr1	15951663	15952660	998	591	92	190.65	10
chr1	15952867	15953338	472	237	49	133.7	6.01
chr1	15956439	15957322	884	657	35	55.85	4.87
chr1	15976451	15977036	586	315	50	196.58	10.62
chr1	16223525	16224530	1006	628	39	58.73	7.3
chr1	16240126	16240624	499	250	41	168.87	9.07
chr1	16248557	16249297	741	402	65	227.06	11.08
chr1	16264297	16265475	1179	886	95	171.36	8.42
chr1	16306422	16307550	1129	551	44	57.97	7.67
chr1	16331637	16332451	816	245	44	106.66	8.41
chr1	16349693	16350215	523	262	28	69.93	6.2
chr1	16360871	16361981	1111	568	58	130.34	11.51
chr1	16371852	16373080	1229	659	52	82.4	7.75
chr1	16374833	16376850	2018	397	223	287.15	8.61
chr1	16409476	16410316	841	585	36	64.86	5.31
chr1	16441205	16442044	840	229	34	56.63	7.08
chr1	16446247	16447401	1155	462	57	95.75	9.81
chr1	16463060	16463447	388	195	25	103.54	5.53
chr1	16526795	16527714	920	257	41	76.86	7.08
chr1	16552444	16553963	1520	417	85	127.96	7.69
chr1	16597471	16598186	717	267	33	67.39	6.86
chr1	16599597	16600694	1098	652	81	207.99	12.44
chr1	16639411	16640227	818	541	32	51.01	6.2
chr1	16656445	16657238	794	447	80	308.73	9.52
chr1	16695584	16696710	1127	445	54	108.45	8.19
chr1	16700829	16701611	783	298	31	50.77	5.53
chr1	16703469	16704181	713	268	35	52.79	5.87
chr1	16793360	16794071	712	243	61	86.25	5.24
chr1	16794722	16795291	571	312	86	275.89	9
chr1	16800438	16801085	648	404	28	53.84	5.75
chr1	16722026	16722985	960	449	53	118.78	8.91
chr1	16729214	16729682	469	235	37	154.98	8.19
chr1	16735070	16735921	852	599	34	55.31	6.64
chr1	16827832	16828435	604	351	47	170.37	9.74
chr1	16830310	16830933	624	268	27	52.45	5.31
chr1	16860400	16861359	961	557	73	247.34	12.95
chr1	16888283	16889364	1082	436	39	51.41	7.3
chr1	16946988	16948245	1258	678	113	233.17	9.33
chr1	16951686	16952473	788	537	32	50.23	6.64
chr1	16967193	16968319	1127	427	63	153.65	11.29
chr1	17015840	17016708	869	617	49	124.07	9.74
chr1	17022312	17023258	947	306	59	165.31	10.62
chr1	17037345	17039003	1660	589	92	127.16	6.92
chr1	17072702	17073990	1289	725	55	58.73	6.45
chr1	17075233	17076049	817	515	39	68.11	5.89
chr1	17082778	17083645	868	310	44	98.27	7.08
chr1	17103886	17104572	687	352	88	297.51	9.72
chr1	17104963	17105594	632	375	41	59.65	5
chr1	17138990	17139916	927	453	36	55.26	7.08
chr1	17145100	17145804	705	439	37	88.73	7.52
chr1	17153202	17153921	720	307	44	124.3	6.42
chr1	17174008	17174872	865	480	50	130.25	6.42
chr1	17181909	17182837	929	667	38	63	5.53
chr1	17191486	17192386	901	342	44	93.32	8.63
chr1	17246833	17247732	900	306	35	54.17	5.31
chr1	17261089	17262040	952	656	56	147.26	7.75
chr1	17268163	17268844	682	366	36	87.34	7.08
chr1	17277430	17277983	554	268	67	344.03	14.61
chr1	17284417	17285167	751	507	32	58.57	4.87
chr1	17286173	17286715	543	281	37	114.15	7.75
chr1	17327598	17328487	890	318	86	253.33	10.4
chr1	17432876	17433797	922	634	47	104.85	9.07
chr1	17440467	17441534	1068	462	110	345.82	14.49
chr1	17470726	17471716	991	332	44	81.09	8.41
chr1	17475168	17476461	1294	715	119	186.58	11.5
chr1	17501081	17502018	938	244	49	112.39	9.74
chr1	17511857	17513359	1503	849	68	111.57	7.08
chr1	17548322	17549398	1077	499	48	87.82	9.3
chr1	17565832	17566661	830	495	49	131.26	8.41
chr1	17578573	17579574	1002	668	45	84.11	9.07
chr1	17609004	17609804	801	535	42	98.78	6.42
chr1	17634784	17635704	921	475	35	50.21	5.42
chr1	17638681	17639183	503	252	27	69.93	5.98
chr1	17641155	17642251	1097	626	57	100.69	9.23
chr1	17654802	17655676	875	415	46	107.25	7.75
chr1	17742819	17744004	1186	479	44	59.77	6.42
chr1	17747181	17747777	597	287	43	145.62	9.07
chr1	17760926	17761984	1059	541	44	60.26	6.15
chr1	17794143	17794674	532	267	30	80.61	6.64
chr1	17808527	17809888	1362	644	84	137.17	11.04
chr1	17858314	17859469	1156	401	71	132.76	9.24
chr1	17900107	17900799	693	394	91	314.81	10.84
chr1	17925668	17926497	829	377	34	57.86	5.53
chr1	17956253	17956735	483	242	31	103.54	6.86
chr1	18009647	18010488	830	509	61	204.19	10.62
chr1	18020737	18022695	1959	467	76	67.52	5.91
chr1	18052966	18053605	640	273	77	213.79	7.88
chr1	18053751	18054385	635	348	73	191.49	7.68
chr1	18068604	18069872	1269	696	169	388.14	9.89
chr1	18082776	18083905	1130	480	57	122.41	11.07
chr1	18114162	18115007	846	259	41	61.54	6.93
chr1	18115102	18116034	933	674	49	80.52	8.1
chr1	18137168	18138391	1224	629	65	147.74	11.07
chr1	18164834	18165385	552	315	27	62.35	5.75
chr1	18167320	18168068	749	300	38	74.43	5.36
chr1	18169584	18170536	953	485	55	100.41	7.08
chr1	18192653	18193231	579	228	33	89.25	7.08
chr1	18201436	18201949	514	258	30	86.15	6.64
chr1	18214873	18215407	535	268	28	69.93	6.2
chr1	18221365	18222402	1038	704	63	170.13	10.62
chr1	18254004	18254673	670	256	41	116.99	8.63
chr1	18266951	18267494	544	285	36	113.92	7.75
chr1	18298474	18299576	1103	649	40	53.06	5.31
chr1	18301420	18302537	1118	263	67	117.98	5.61
chr1	18306448	18307263	816	215	36	63.6	7.75
chr1	18321929	18322873	945	274	58	94.12	7.58
chr1	18335379	18336049	671	323	61	235.68	10.99
chr1	18340758	18341729	972	440	132	338.24	10.17
chr1	18357897	18359316	1420	340	69	100.65	7.28
chr1	18361419	18362012	594	307	77	269.41	9.86
chr1	18362443	18363050	608	303	52	115.67	6.72
chr1	18368590	18369866	1277	691	58	85.14	10.12
chr1	18393087	18394416	1330	603	58	66.87	4.44
chr1	18486197	18487185	989	718	86	295.47	12.57
chr1	18451480	18452436	957	691	73	228.67	10.55
chr1	18467482	18468295	815	488	65	167.25	9.73
chr1	18474447	18475688	1242	261	102	280.94	11.68
chr1	18482796	18483351	556	262	43	149.56	9.3
chr1	18525556	18526231	676	255	68	285.55	11.19
chr1	18532889	18533455	567	292	94	473.51	14.8
chr1	18551417	18552840	1424	1033	68	96.26	5.97
chr1	18579299	18580282	984	700	65	151.31	8.69
chr1	18598325	18598932	608	263	64	242.55	10.91
chr1	18613088	18613640	553	254	25	52.66	5.31
chr1	18625134	18626047	914	384	43	50.9	4.06
chr1	18640714	18641359	646	379	52	142.75	8
chr1	18661041	18661936	896	631	54	124.58	9.33
chr1	18671975	18673869	1895	1189	130	165.73	11.09
chr1	18696158	18697303	1146	486	55	78.47	4.48
chr1	18701650	18702806	1167	423	105	252.46	8.7
chr1	18718084	18718771	688	345	56	191.62	10.14
chr1	18731463	18732020	558	267	86	387.29	12.69
chr1	18734633	18735059	427	214	49	268.84	9.42
chr1	18745811	18746670	860	249	41	84.92	8.19
chr1	18754123	18755419	1297	631	83	148.1	11.23
chr1	18760835	18762888	2054	656	145	134.36	7.21
chr1	18774113	18775930	1818	1204	147	150.48	6.77
chr1	18768613	18769607	998	604	45	84.63	8.19
chr1	18800410	18801344	935	263	85	262.63	12.89
chr1	18803446	18804034	589	265	33	50.6	4.4
chr1	18804104	18804853	750	406	53	106.17	7.4
chr1	18835293	18836570	1278	562	114	228.24	11.69
chr1	18841401	18842283	883	254	34	52.05	4.43
chr1	18845009	18846069	1061	606	45	76.86	7.08
chr1	18854372	18855673	1302	690	57	94.03	6.65
chr1	18860264	18861072	809	251	38	64.97	7.27
chr1	18869956	18870803	848	596	43	96.39	8.85
chr1	18903080	18903579	500	251	25	59.83	5.53
chr1	18904416	18905062	647	267	31	63.04	6.2
chr1	18927426	18928287	862	546	78	200.46	10.7
chr1	18928861	18929460	600	252	48	104.34	6.75
chr1	18935350	18936355	1005	730	72	114.49	7.7
chr1	18950466	18951013	548	247	31	62.83	5.33
chr1	18952596	18954461	1866	1190	227	292.74	5.55
chr1	18963321	18963911	591	326	47	112.19	6.27
chr1	18968075	18969719	1645	1003	83	65.94	5.64
chr1	18970718	18971430	713	261	51	105.53	7.46
chr1	18974902	18976058	1157	838	85	182.78	9.25
chr1	18988275	18990274	2000	403	255	143.99	4.55
chr1	18991757	18992778	1022	406	118	264.42	6.88
chr1	19005025	19006062	1038	568	54	121.75	7.52
chr1	19008570	19009439	869	605	36	61.57	6.64
chr1	19012195	19013421	1227	278	77	120.3	6.22
chr1	19016421	19018070	1650	989	154	225.73	9.83
chr1	19028130	19028997	868	611	43	93.35	7.75
chr1	19042386	19043658	1282	928	69	99.37	5.73
chr1	19054507	19055524	1018	272	70	119.17	6.08
chr1	19062735	19063924	1190	662	64	144.26	11.28
chr1	19066666	19067199	537	267	27	64.65	5.75
chr1	19072194	19073491	1299	559	86	172.07	11.06
chr1	19081493	19082658	1166	517	141	380.18	13.44
chr1	19084064	19085713	1652	1014	100	172.67	9.24
chr1	19094002	19094845	844	297	52	145.6	10.62
chr1	19103499	19104325	827	549	63	96.68	5.98
chr1	19107393	19107878	486	244	26	53.78	4.76
chr1	19110149	19111379	1231	582	78	162.04	7.22
chr1	19116749	19117893	1145	620	69	120.47	9.49
chr1	19122370	19124142	1773	1058	119	93.45	7.67
chr1	19128964	19129478	515	258	68	260.89	9.54
chr1	19140757	19141770	1014	677	71	149.04	9.89
chr1	19147470	19148255	786	425	52	140.81	8.71
chr1	19152410	19153101	692	323	111	363.75	11.01
chr1	19167177	19167938	762	258	42	105.34	8.63
chr1	19175429	19176301	873	590	57	110.67	8.29
chr1	19181487	19182404	918	251	38	64.25	5.75
chr1	19190076	19191114	1039	433	49	97.37	7.08
chr1	19199843	19200583	741	267	31	55.5	4.65
chr1	19216518	19217487	970	314	53	93.26	8.35
chr1	19218202	19218912	711	249	36	62.33	6.28
chr1	19229866	19231066	1201	299	95	176.6	8.34
chr1	19233699	19234658	960	404	51	104.07	7.88
chr1	19239000	19239589	590	270	30	61.56	5.36
chr1	19240693	19241266	574	263	52	180.29	9.71
chr1	19243358	19244264	907	673	47	107.2	5.53
chr1	19247174	19247990	817	354	51	145.27	9.96
chr1	19252864	19254920	2057	1224	132	129.98	6.26
chr1	19256473	19257382	910	666	51	127.56	7.52
chr1	19290198	19291375	1178	629	142	302.77	10.11
chr1	19297425	19298034	610	300	57	240.48	11.29
chr1	19302428	19303647	1220	478	94	152.67	6.6
chr1	19306418	19307579	1162	605	44	58.53	5.79
chr1	19311182	19312107	926	336	40	71.74	7.52
chr1	19328291	19329717	1427	719	72	119.85	11.04
chr1	19340742	19341920	1179	484	67	95.94	5.24
chr1	19360517	19361483	967	376	42	75.36	8.19
chr1	19369003	19369828	826	493	56	118.01	5.52
chr1	19386311	19387223	913	647	47	106.25	9.3
chr1	19395008	19395891	884	315	40	77.04	6.42
chr1	19399402	19400235	834	402	54	159.45	10.4
chr1	19417546	19418539	994	296	71	174.84	10.38
chr1	19471170	19471876	707	308	34	52.29	4.8
chr1	19484497	19485513	1017	719	65	131.95	9.16
chr1	19498705	19499900	1196	625	56	73.81	7.25
chr1	19521736	19522869	1134	637	42	57.39	7.97
chr1	19530813	19531440	628	361	73	212.21	8.46
chr1	19532594	19533694	1101	620	54	50.2	5.98
chr1	19541056	19541818	763	311	41	54.86	5.27
chr1	19542062	19543077	1016	299	70	133.9	6.69
chr1	19551901	19553459	1559	240	91	153.44	7.02
chr1	19558730	19559466	737	471	59	104.33	6.63
chr1	19559718	19560781	1064	375	66	72.59	6.93
chr1	19568508	19569522	1015	350	47	91.42	8.85
chr1	19578997	19579778	782	246	38	81.82	7.75
chr1	19581548	19582049	502	252	32	103.54	7.08
chr1	19599430	19600745	1317	662	66	138.24	10.84
chr1	19602397	19603227	831	584	38	74.98	5.09
chr1	19617038	19617587	550	285	58	152.14	7.04
chr1	19621071	19621848	778	542	41	75.32	4.62
chr1	19622725	19623626	902	266	48	98.69	8.91
chr1	19631888	19632883	996	412	58	72.94	6.27
chr1	19645205	19645900	696	435	50	164.92	10.1
chr1	19668568	19669256	689	264	55	129.53	7.31
chr1	19672681	19673694	1014	700	68	164.94	11.82
chr1	19675631	19676813	1183	477	48	65.75	5.13
chr1	19690016	19691358	1343	737	83	163.11	11.68
chr1	19693409	19694397	989	303	128	394.07	14.42
chr1	19702369	19704223	1853	1379	123	187.14	6.08
chr1	19710793	19711249	457	229	28	91.82	6.2
chr1	19735543	19736630	1088	389	77	139.83	8.52
chr1	19739176	19740055	880	282	40	77.57	5.75
chr1	19750641	19751926	1286	638	76	160.25	12.76
chr1	19775573	19776147	575	262	49	192.76	10.4
chr1	19779860	19781273	1412	853	189	388.41	11.09
chr1	19789514	19790469	957	264	39	63.95	8.19
chr1	19791796	19792747	952	568	60	170.12	9.74
chr1	19809515	19810435	920	256	56	153.43	11.29
chr1	19812863	19813874	1012	608	57	138.19	9.55
chr1	19831323	19832155	833	351	33	53.37	4.87
chr1	19844183	19845187	1005	740	83	259.45	13.57
chr1	19847060	19847779	720	456	44	118.57	7.52
chr1	19873157	19874439	1283	445	133	329.94	10.97
chr1	19881950	19885415	3467	2309	210	61.67	4
chr1	19915015	19915552	538	273	32	91.43	6.86
chr1	19918624	19919831	1208	628	45	61.34	7.75
chr1	19925819	19927203	1385	774	162	349.86	13.59
chr1	19935066	19936748	1683	660	175	189.13	8.14
chr1	19952903	19953523	621	263	119	364.82	9.49
chr1	19953772	19954572	801	308	72	69.87	5.61
chr1	19956886	19957484	599	265	89	439.68	15
chr1	19960098	19961330	1233	666	76	192.64	12.16
chr1	19966645	19967504	860	433	101	331.52	10.1
chr1	19997024	19998177	1154	664	79	212.33	14.69
chr1	20005779	20006370	592	347	43	140.4	8.85
chr1	20019040	20019935	896	254	44	94.05	6.64
chr1	20023784	20025043	1260	578	51	78.98	6.64
chr1	20027166	20028759	1594	730	149	305.4	12.19
chr1	20031944	20032824	881	267	67	210.53	12.78
chr1	20038094	20039739	1646	1155	69	103.32	6.15
chr1	20090257	20091149	893	626	48	114.61	10.18
chr1	20097848	20098403	556	265	27	61.75	5.75
chr1	20116967	20118765	1801	535	108	169.92	7.08
chr1	20123976	20124878	903	569	49	118.15	7.3
chr1	20126680	20127630	951	599	40	68.76	7.75
chr1	20149005	20149544	540	268	38	120.36	7.76
chr1	20149686	20150283	598	261	41	113.28	7.82
chr1	20158411	20159727	1317	757	50	69.28	5.53
chr1	20163705	20164745	1041	377	40	59	7.52
chr1	20179796	20180805	1010	710	106	349.69	15.18
chr1	20185416	20186437	1022	316	54	124.32	7.08
chr1	20199671	20200969	1299	837	97	200.05	7.52
chr1	20212750	20213541	792	263	42	100.25	7.97
chr1	20221996	20223197	1202	937	138	341.49	12.4
chr1	20227971	20228828	858	525	159	602.58	11.84
chr1	20231154	20232059	906	244	63	183.32	11.24
chr1	20248241	20249121	881	266	34	52.25	4.65
chr1	20258286	20258878	593	240	29	66.02	5.98
chr1	20273716	20274797	1082	737	101	299.93	14.64
chr1	20323376	20323944	569	304	57	255.07	12.17
chr1	20335671	20336347	677	319	37	77.48	6.15
chr1	20345287	20345889	603	255	42	136.56	8.78
chr1	20359637	20360615	979	259	57	147.75	5.98
chr1	20407812	20408726	915	650	67	221.82	13.28
chr1	20417994	20418808	815	424	69	142.5	7.2
chr1	20420475	20421272	798	539	33	57.26	5.31
chr1	20431237	20431687	451	226	27	91.82	5.98
chr1	20474205	20474909	705	261	31	59.91	6.42
chr1	20480380	20481244	865	310	50	130.25	10.18
chr1	20500262	20501218	957	622	44	85.51	7.97
chr1	20503736	20505360	1625	720	87	89.62	6.22
chr1	20527514	20528770	1257	609	68	146.51	9.22
chr1	20542611	20543061	451	226	26	80.61	5.75
chr1	20567047	20567862	816	260	42	88.07	7.05
chr1	20571678	20572261	584	283	29	67.39	5.75
chr1	20587415	20588122	708	402	46	138.6	9.07
chr1	20600853	20601574	722	465	67	246.73	12.05
chr1	20607945	20608780	836	321	89	228.04	9.08
chr1	20610648	20611384	737	422	56	130.15	7
chr1	20613414	20613965	552	260	33	86.2	6.56
chr1	20622526	20623641	1116	468	76	208.87	12.37
chr1	20636638	20637573	936	674	63	124.9	8.38
chr1	20662085	20662594	510	256	68	334.13	12.32
chr1	20664696	20665760	1065	430	74	160.74	10.73
chr1	20672126	20673328	1203	687	56	107.26	11.29
chr1	20684436	20685420	985	310	82	116.07	8.27
chr1	20686175	20686973	799	395	89	185.6	6.8
chr1	20690377	20691422	1046	321	67	159.45	9.14
chr1	20705381	20705865	485	243	35	128.39	7.75
chr1	20710515	20711382	868	274	63	198.44	12.3
chr1	20717038	20718301	1264	568	91	176.68	12.54
chr1	20721657	20722628	972	315	171	518.65	12.62
chr1	20730927	20731609	683	450	29	53.89	5.98
chr1	20733946	20735519	1574	931	113	188.28	9.61
chr1	20738772	20739584	813	234	42	71.39	4.48
chr1	20746255	20747531	1277	875	67	144.34	5.09
chr1	20755215	20756898	1685	991	92	127.45	8.36
chr1	20765259	20765868	610	300	57	238.76	11.85
chr1	20783420	20784394	975	350	85	180.26	10.05
chr1	20785785	20786530	746	264	48	55.02	4.61
chr1	20797657	20799568	1912	369	177	253.07	5.95
chr1	20817719	20819093	1375	651	83	153.03	11.98
chr1	20834768	20835346	579	363	28	63.22	5.98
chr1	20845309	20845994	686	383	54	158.55	9.06
chr1	20856544	20857416	873	323	77	159.25	8.75
chr1	20861533	20862233	701	437	48	88.37	6.65
chr1	20880950	20881622	673	323	33	73.65	6.42
chr1	20915602	20916768	1167	435	61	116.86	7.34
chr1	20925361	20926261	901	592	35	54.06	4.65
chr1	20942432	20943219	788	376	34	62.7	6.64
chr1	20985972	20987132	1161	427	72	163.07	6.66
chr1	20998280	20999341	1062	707	60	66.73	5.95
chr1	21028699	21030236	1538	716	153	259.42	9.33
chr1	21034281	21034909	629	233	32	75.43	6.64
chr1	21039447	21040363	917	259	47	105.63	8.19
chr1	21050021	21051291	1271	603	89	165.99	11.94
chr1	21053069	21053979	916	617	40	72.97	7.52
chr1	21077525	21078377	853	602	33	51.26	5.75
chr1	21094122	21095789	1668	643	235	108.56	5.15
chr1	21113500	21115469	1970	473	115	72.15	5.22
chr1	21126879	21127441	563	303	42	147.72	8.41
chr1	21138484	21139387	904	666	40	74.47	6.64
chr1	21145399	21146372	974	671	90	279.29	13.61
chr1	21154540	21155807	1268	686	44	52.48	7.75
chr1	21157481	21158457	977	597	39	61.77	7.08
chr1	21162055	21162652	598	345	61	246.77	10.49
chr1	21166801	21168905	2105	492	104	82.44	3.99
chr1	21182020	21183170	1151	649	47	74.86	8.63
chr1	21189841	21190676	836	212	44	103.34	7.52
chr1	21204053	21204965	913	294	39	69.03	7.52
chr1	21206745	21207546	802	267	32	52.72	4.87
chr1	21232878	21233519	642	336	38	105.34	7.52
chr1	21235714	21236493	780	259	64	238	12.62
chr1	21246565	21247304	740	309	41	99.76	7.51
chr1	21257544	21258183	640	346	39	111.45	7.3
chr1	21270493	21271639	1147	616	44	63.55	7.52
chr1	21275645	21276327	683	429	37	92.41	7.75
chr1	21278012	21278861	850	598	53	142.77	10.39
chr1	21288892	21289947	1056	589	53	113.99	5.75
chr1	21297868	21298847	976	577	141	410.71	12.33
chr1	21316648	21317290	643	288	30	63.6	5.75
chr1	21319367	21320494	1129	450	46	73.25	8.19
chr1	21324530	21325660	1131	491	48	74.17	6.71
chr1	21336326	21337187	862	462	79	158.39	8.67
chr1	21338849	21340389	1541	798	115	99.36	7.83
chr1	21348613	21349499	887	382	84	273.95	9.93
chr1	21363029	21363597	569	304	79	313.68	11.11
chr1	21371165	21372344	1180	560	43	56.72	8.63
chr1	21386089	21386920	832	568	54	152.22	10.81
chr1	21389223	21390219	999	281	49	84.68	4.86
chr1	21393408	21394697	1290	653	85	150.34	9.63
chr1	21403886	21404815	930	663	65	168.86	9.33
chr1	21409205	21409987	784	447	36	54	5.73
chr1	21412983	21415062	2087	542	179	153.68	8.53
chr1	21421262	21422229	968	267	62	127.13	10.11
chr1	21428273	21429018	746	489	49	148.44	10.4
chr1	21431789	21432646	858	565	55	99.84	7.34
chr1	21436659	21437898	1240	711	72	103.12	5.16
chr1	21441953	21442595	643	328	38	97.14	7.05
chr1	21444136	21444759	624	261	43	120.57	8.11
chr1	21448113	21449002	890	440	56	139.85	9.73
chr1	21455969	21456837	869	542	76	104.22	5.53
chr1	21457232	21458268	1037	585	78	71.52	5.12
chr1	21466154	21467405	1252	654	67	153.41	11.95
chr1	21469068	21470119	1052	395	95	295.28	14.17
chr1	21472699	21473898	1200	520	49	73.4	7.29
chr1	21481829	21482999	1171	921	75	57.46	3.9
chr1	21483678	21484304	627	255	46	55.55	4.58
chr1	21491952	21492800	849	418	51	80.2	5.87
chr1	21501934	21502870	937	312	53	114	8.25
chr1	21505096	21506109	1014	363	110	279.96	9.15
chr1	21520220	21521205	986	288	42	73.07	7.08
chr1	21548137	21549407	1271	740	151	160.78	8.03
chr1	21550154	21550870	717	366	66	68.13	3.55
chr1	21575033	21575845	813	479	37	72.83	6.64
chr1	21591525	21592786	1262	715	94	193.63	13.24
chr1	21616111	21617038	928	399	39	61.05	5.21
chr1	21636430	21637090	661	342	42	118.76	7.42
chr1	21657890	21659127	1243	683	62	87.02	8.29
chr1	21693700	21696151	2452	1802	360	248.43	6.06
chr1	21724835	21725840	1006	589	50	77.04	7.71
chr1	21735990	21736680	691	261	30	57.26	6.2
chr1	21746368	21747580	1213	573	57	61.41	5.26
chr1	21769981	21770597	617	288	31	66.1	4.98
chr1	21783896	21784958	1076	590	49	92.4	8.85
chr1	21786843	21787664	822	565	56	174.3	11.07
chr1	21789766	21790586	821	256	33	54.67	4.43
chr1	21821545	21823339	1795	1529	122	135.88	6.06
chr1	21826546	21827234	689	237	58	186.02	9.61
chr1	21838754	21839607	854	540	33	51.16	5.31
chr1	21843038	21844415	1378	867	176	294.54	4.88
chr1	21846040	21846512	473	237	32	58.65	4.42
chr1	21855976	21856817	842	580	41	87.5	6.86
chr1	21877988	21878877	890	331	51	131.15	9.07
chr1	21906011	21906962	952	532	39	63.63	4.83
chr1	21913463	21914400	941	261	56	133.85	10.75
chr1	21962884	21963431	548	262	27	62.95	5.75
chr1	21932584	21933917	1334	676	81	148.93	10.52
chr1	21925403	21926434	1032	776	94	240.34	9.11
chr1	21917080	21917589	510	256	34	103.21	7.13
chr1	21984683	21985544	862	414	95	322.96	9.1
chr1	21993035	21994063	1029	301	96	240.84	12.95
chr1	22003489	22004051	563	311	74	276.49	10.24
chr1	22023700	22024598	899	541	50	119.2	8.15
chr1	22030549	22031467	919	264	35	52.23	6.86
chr1	22059928	22061297	1370	775	85	140.03	10.11
chr1	22073247	22073927	681	291	34	77.36	6.64
chr1	22089452	22091348	1897	1116	124	122.77	6.72
chr1	22094276	22094904	629	334	30	65.58	5.98
chr1	22101399	22102253	855	568	34	54.99	5.98
chr1	22143706	22145003	1298	539	81	110.88	7.63
chr1	22161270	22162055	786	404	33	58.65	4.87
chr1	22167613	22168391	779	415	41	97.23	5.53
chr1	22179491	22180032	542	281	33	96.4	7.08
chr1	22181768	22182459	692	259	32	66.17	6.64
chr1	22188453	22189074	623	290	39	114.92	7.52
chr1	22228489	22229569	1081	437	40	55.1	7.3
chr1	22269209	22270814	1606	848	106	112.19	6.45
chr1	22296529	22297115	587	299	43	61.66	4.26
chr1	22297667	22298230	564	254	55	145.35	7.46
chr1	22301894	22302391	498	250	28	80.61	6.2
chr1	22312499	22313417	919	315	152	392.29	11.61
chr1	22314814	22315983	1170	583	43	57.65	7.3
chr1	22330170	22330832	663	365	57	223.3	11.29
chr1	22336277	22337357	1081	382	75	162.38	9.25
chr1	22365358	22366528	1171	534	46	68.77	7.3
chr1	22379877	22380982	1106	779	107	210.72	9.27
chr1	22385103	22386173	1071	506	77	181.01	11.02
chr1	22393214	22394305	1092	640	47	60.44	7.28
chr1	22415720	22416262	543	265	25	54.02	5.31
chr1	22420168	22421291	1124	309	110	309.46	9.84
chr1	22437097	22437915	819	282	55	168.81	11.29
chr1	22469929	22470450	522	262	29	75.2	6.42
chr1	22451246	22451813	569	261	25	50.54	5.31
chr1	22515707	22516784	1078	394	44	70.8	7.52
chr1	22526660	22528564	1905	1216	91	65.36	5.37
chr1	22553000	22553612	613	349	51	189.85	10.08
chr1	22562041	22563166	1129	608	41	54.25	5.53
chr1	22573091	22573917	827	528	117	418.79	13.29
chr1	22589268	22589783	516	259	31	91.82	6.86
chr1	22601554	22603567	2014	1344	96	51.54	6.89
chr1	22616315	22617241	927	271	41	75.97	7.97
chr1	22620690	22622032	1343	702	56	81.88	6.5
chr1	22625083	22626052	970	611	43	78.33	7.9
chr1	22632033	22632563	533	267	31	74.32	6.09
chr1	22634224	22634911	688	263	42	118.02	8.56
chr1	22660518	22661619	1102	619	56	121.76	9.96
chr1	22680968	22681918	951	698	51	110.34	7.05
chr1	22693512	22694484	973	259	53	83.21	7.7
chr1	22700126	22701401	1276	690	97	164.71	11.64
chr1	22709940	22710738	799	500	42	99.1	8.19
chr1	22714367	22714959	593	305	48	171.16	9.43
chr1	22721193	22722064	872	297	42	87.95	8.41
chr1	22726733	22727574	842	200	34	56.41	6.42
chr1	22749916	22750878	963	260	58	118.67	10.05
chr1	22761997	22762980	984	694	41	69.11	7.52
chr1	22787263	22787757	495	248	25	64.81	5.53
chr1	22793771	22794580	810	244	49	135.13	9.3
chr1	22800390	22801440	1051	319	96	258.12	12.64
chr1	22809696	22810403	708	460	32	64.01	5.75
chr1	22811269	22811808	540	266	28	63.59	5.6
chr1	22837214	22838497	1284	669	83	127.63	7.87
chr1	22843203	22844153	951	485	36	52.83	4.87
chr1	22851277	22852689	1413	569	130	259.87	9.21
chr1	22864979	22866222	1244	737	94	195.39	11.49
chr1	22871454	22872008	555	262	25	52.39	5.31
chr1	22874864	22875715	852	258	70	222.57	12.56
chr1	22879987	22880531	545	285	39	132.63	8.19
chr1	22927393	22928093	701	260	45	134.1	9.52
chr1	22939801	22940726	926	568	50	77.03	7.26
chr1	22942690	22943261	572	327	50	174.22	9.14
chr1	22969098	22970063	970	592	81	165.49	6.48
chr1	22988291	22988849	559	263	37	107.23	7.38
chr1	23000848	23001654	807	266	33	56.23	6.42
chr1	23021446	23022373	928	664	63	193.38	10.84
chr1	23091719	23093507	1789	708	117	148.28	7.88
chr1	23095603	23096163	563	314	26	55.94	5.53
chr1	23115180	23116263	1084	342	106	301.28	9.92
chr1	23158333	23159275	943	611	44	87.39	4.87
chr1	23173176	23174403	1228	603	47	66.81	8.19
chr1	23187658	23188207	550	263	30	78.12	6.42
chr1	23204769	23205993	1225	662	61	127.67	10.62
chr1	23285220	23286347	1128	523	53	77.17	9.05
chr1	23287712	23288425	714	265	40	78.58	6.34
chr1	23300141	23300887	747	303	88	356.48	13.13
chr1	23314765	23315521	757	460	46	128.43	9.3
chr1	23325927	23327158	1232	581	87	190.63	13.04
chr1	23331017	23331635	619	320	40	89.95	6.05
chr1	23341105	23341774	670	332	37	94.66	6.86
chr1	23411482	23412361	880	623	35	56.28	6.86
chr1	23456917	23457543	627	264	36	96.97	7.3
chr1	23489752	23491031	1280	598	53	81.98	7.59
chr1	24961536	24962475	940	268	69	218.44	13.78
chr1	24957948	24958853	906	696	50	122.92	7.3
chr1	24945819	24946370	552	254	26	57.49	5.53
chr1	24939582	24940294	713	386	57	208.57	11.73
chr1	24914801	24915343	543	268	26	58.8	5.53
chr1	24908933	24910053	1121	625	43	61.44	7.68
chr1	24901391	24902105	715	244	50	161.73	10.62
chr1	24892391	24893061	671	418	35	83.99	7.3
chr1	24868536	24869191	656	284	54	183.44	9.33
chr1	24855523	24856455	935	683	40	70.65	7.3
chr1	24844614	24845818	1205	684	67	102.62	6.71
chr1	24837164	24837925	762	511	41	100.05	8.63
chr1	24830509	24831464	956	384	59	163.49	10.4
chr1	24822525	24823122	598	317	49	185.89	10.4
chr1	24818985	24820012	1029	498	63	158.71	10.99
chr1	24775373	24776305	933	263	59	122.4	9.16
chr1	24765582	24766381	800	338	86	344.27	14.93
chr1	24759381	24760248	868	432	39	74.64	7.52
chr1	24744204	24744883	680	244	37	92.92	7.3
chr1	24728782	24729576	795	444	62	175.89	8.97
chr1	24724920	24726078	1160	265	99	165	7.46
chr1	24721701	24722695	995	738	85	250.2	12.44
chr1	24709197	24709971	775	515	33	59.97	5.98
chr1	24675432	24676680	1249	706	71	175	7.3
chr1	24672059	24672953	891	341	43	84.54	7.42
chr1	24671237	24671935	699	420	34	63.53	5.6
chr1	24656316	24657173	858	470	46	110.05	8.41
chr1	24651373	24652606	1234	621	60	85.03	9.06
chr1	24649068	24649708	641	347	32	73.56	5.98
chr1	24639012	24639575	566	266	51	210.22	11.07
chr1	24635749	24636333	585	267	78	420.51	16.7
chr1	24623794	24624726	931	266	40	66.91	7.75
chr1	24591303	24592006	704	414	30	51.41	5.98
chr1	24577403	24578452	1050	709	49	95.86	6.86
chr1	24574497	24575443	947	696	78	161.69	8.79
chr1	24567622	24568567	946	263	69	116.32	8.2
chr1	24559873	24560598	726	211	34	70.8	5.09
chr1	24547244	24547774	542	265	37	77.63	5.4
chr1	24537674	24538967	1294	828	69	156.8	7.3
chr1	24496428	24497505	1083	659	74	123.91	9.47
chr1	24495863	24496410	548	251	31	50.61	4.87
chr1	24483890	24484647	758	325	91	334.62	11.62
chr1	24470229	24471279	1051	474	66	184.81	6.42
chr1	24462545	24463146	602	297	122	582.83	14.05
chr1	24459042	24459626	585	255	28	57.78	5.45
chr1	24457080	24457660	581	268	36	100.16	7.08
chr1	24397973	24399101	1129	680	78	204.26	11.35
chr1	24377083	24377929	847	268	42	91.61	8.19
chr1	24362960	24363657	698	394	33	70.02	5.98
chr1	24339023	24339992	970	432	46	92.96	6.42
chr1	24335219	24336432	1214	679	70	123.97	7.95
chr1	24331342	24331890	549	260	29	54.59	5.02
chr1	24328634	24329380	747	255	52	132.49	8.69
chr1	24304524	24305783	1260	641	57	52.22	7.86
chr1	24264898	24265724	827	243	38	75.52	8.19
chr1	24262021	24262877	857	605	79	253.87	12.78
chr1	24258329	24259667	1339	581	121	250.75	10.21
chr1	24253596	24254592	998	338	135	364.96	12.44
chr1	24245212	24246299	1088	400	122	334.66	12.73
chr1	24226240	24226710	471	236	30	103.54	6.64
chr1	24220832	24221806	975	715	131	405.3	14.78
[truncated: 244,564+ more rows]
